# Supplementary material for: Burkholderia pseudomallei, the causative agent of melioidosis, is rare but ecologically established and widely dispersed in the environment in Puerto Rico
Source: PLoS Negl Trop Dis. 2019 Sep 5;13(9):e0007727. doi: 10.1371/journal.pntd.0007727 (PMC6748447; doi:10.1371/journal.pntd.0007727)
Supplement: S2 Table — n/a = not applicable. (XLSX) [file pntd.0007727.s004.XLSX]

## Sheet: S2 Table
Genome	Accession	Included in Fig 2-3?	Included in Fig 4?	Included in S1 Fig?	Included in Beast analysis?
GCA_000015905.1_Burkholderia_pseudomallei_668_Complete_Genome_ST129	GCA_000015905	yes	no	no	no
GCA_000959305.1_Burkholderia_pseudomallei_MSHR668_Complete_Genome_ST129	GCA_000959305	yes	no	no	no
GCA_000959185.1_Burkholderia_pseudomallei_MSHR840_Complete_Genome_ST257	GCA_000959185	yes	no	no	no
GCA_001318245.1_Burkholderia_pseudomallei_Bp1651_Complete_Genome_ST880	GCA_001318245	yes	no	no	no
GCA_001980105.1_Burkholderia_pseudomallei_MSHR0911_Contig_ST112	GCA_001980105	yes	no	no	no
GCA_000770515.1_Burkholderia_pseudomallei_K42_Complete_Genome_ST267	GCA_000770515	yes	no	no	no
GCA_000770455.1_Burkholderia_pseudomallei_B03_Complete_Genome_ST667	GCA_000770455	yes	no	no	no
GCA_000770535.1_Burkholderia_pseudomallei_A79A_Complete_Genome_ST667	GCA_000770535	yes	no	no	no
GCA_000775675.1_Burkholderia_pseudomallei_A79C_Contig_ST667	GCA_000775675	yes	no	no	no
GCA_000775685.1_Burkholderia_pseudomallei_A79D_Contig_ST667	GCA_000775685	yes	no	no	no
GCA_001979965.1_Burkholderia_pseudomallei_MSHR0474_Contig_ST1356	GCA_001979965	yes	no	no	no
GCA_001980205.1_Burkholderia_pseudomallei_MSHR3876_Contig_ST842	GCA_001980205	yes	no	no	no
GCA_000773075.1_Burkholderia_pseudomallei_MSHR7504_Contig_ST1032	GCA_000773075	yes	no	no	no
GCA_000773305.1_Burkholderia_pseudomallei_MSHR7527_Contig_ST1033	GCA_000773305	yes	no	no	no
GCA_000773155.1_Burkholderia_pseudomallei_MSHR5609_Contig_ST1029	GCA_000773155	yes	no	no	no
GCA_000775115.1_Burkholderia_pseudomallei_TSV44_Contig_ST276	GCA_000775115	yes	no	no	no
GCA_000773415.1_Burkholderia_pseudomallei_MSHR7500_Contig_ST1031	GCA_000773415	yes	no	no	no
GCA_001974745.1_Burkholderia_pseudomallei_MSHR6522_Chromosome_ST437	GCA_001974745	yes	no	no	no
GCA_001975065.1_Burkholderia_pseudomallei_MSHR7929_Complete_Genome_ST437	GCA_001975065	yes	no	no	no
GCA_000932085.1_Burkholderia_pseudomallei_QCMRI_BP13_Contig_ST1041	GCA_000932085	yes	no	no	no
GCA_000511895.1_Burkholderia_pseudomallei_NCTC_13178_Complete_Genome_ST286	GCA_000511895	yes	no	no	no
GCA_001446055.1_Burkholderia_pseudomallei_NCTC_13178_Contig_ST286	GCA_001446055	yes	no	no	no
GCA_000773165.1_Burkholderia_pseudomallei_MSHR5613_Contig_ST866	GCA_000773165	yes	no	no	no
GCA_000773255.1_Burkholderia_pseudomallei_MSHR5492_Contig_ST862	GCA_000773255	yes	no	no	no
GCA_001980145.1_Burkholderia_pseudomallei_MSHR3499_Contig_ST862	GCA_001980145	yes	no	no	no
GCA_000500655.1_Burkholderia_pseudomallei_MSHR6137_Contig_ST325	GCA_000500655	yes	no	no	no
GCA_001979165.1_Burkholderia_pseudomallei_MSHR2053_Contig_ST1356	GCA_001979165	yes	no	no	no
GCA_001975085.1_Burkholderia_pseudomallei_MSHR6755_Complete_Genome_ST975	GCA_001975085	yes	no	no	no
GCA_001975105.1_Burkholderia_pseudomallei_MSHR5864_Complete_Genome_ST975	GCA_001975105	yes	no	no	no
GCA_000959205.1_Burkholderia_pseudomallei_MSHR491_Complete_Genome_ST126	GCA_000959205	yes	no	no	no
GCA_001980045.1_Burkholderia_pseudomallei_MSHR0445A_Contig_ST126	GCA_001980045	yes	no	no	no
GCA_001980245.1_Burkholderia_pseudomallei_MSHR4250_Contig_ST109	GCA_001980245	yes	no	no	no
GCA_001980305.1_Burkholderia_pseudomallei_MSHR4483_Contig_ST109	GCA_001980305	yes	no	no	no
GCA_000773295.1_Burkholderia_pseudomallei_MSHR4868_Contig_ST1026	GCA_000773295	yes	no	no	no
GCA_001979115.1_Burkholderia_pseudomallei_MSHR0800_Contig_ST114	GCA_001979115	yes	no	no	no
GCA_001976965.1_Burkholderia_pseudomallei_RF62_BP41_Contig_ST114	GCA_001976965	yes	no	no	no
GCA_001979135.1_Burkholderia_pseudomallei_MSHR0952_Contig_ST114	GCA_001979135	yes	no	no	no
GCA_000770395.1_Burkholderia_pseudomallei_MSHR62_Complete_Genome_ST	GCA_000770395	yes	no	no	no
GCA_001445955.1_Burkholderia_pseudomallei_MSHR465a_Contig_ST132	GCA_001445955	yes	no	no	no
GCA_001978185.1_Burkholderia_pseudomallei_MSHR0465A_Contig_ST132	GCA_001978185	yes	no	no	no
GCA_000764575.1_Burkholderia_pseudomallei_NAU35A_3_Complete_Genome_ST326	GCA_000764575	yes	no	no	no
GCA_001978405.1_Burkholderia_pseudomallei_NAU14A_1_Contig_ST326	GCA_001978405	yes	no	no	no
GCA_001978965.1_Burkholderia_pseudomallei_NAU35B_2_Contig_ST326	GCA_001978965	yes	no	no	no
GCA_001978005.1_Burkholderia_pseudomallei_INT2_BP264_Contig_ST326	GCA_001978005	yes	no	no	no
GCA_001978985.1_Burkholderia_pseudomallei_NAU35B_3_Contig_ST326	GCA_001978985	yes	no	no	no
GCA_001977955.1_Burkholderia_pseudomallei_INT2_BP241_Contig_ST326	GCA_001977955	yes	no	no	no
GCA_001978865.1_Burkholderia_pseudomallei_NAU22B_1_Contig_ST326	GCA_001978865	yes	no	no	no
GCA_001978835.1_Burkholderia_pseudomallei_NAU22A_5_Contig_ST326	GCA_001978835	yes	no	no	no
GCA_001978245.1_Burkholderia_pseudomallei_NAU2B_1_Contig_ST326	GCA_001978245	yes	no	no	no
GCA_001978585.1_Burkholderia_pseudomallei_NAU14B_5_Contig_ST326	GCA_001978585	yes	no	no	no
GCA_001978665.1_Burkholderia_pseudomallei_NAU14B_10_Contig_ST326	GCA_001978665	yes	no	no	no
GCA_001978525.1_Burkholderia_pseudomallei_NAU14B_2_Contig_ST326	GCA_001978525	yes	no	no	no
GCA_001978485.1_Burkholderia_pseudomallei_NAU14A_10_Contig_ST326	GCA_001978485	yes	no	no	no
GCA_001978505.1_Burkholderia_pseudomallei_NAU14A_8_Contig_ST326	GCA_001978505	yes	no	no	no
GCA_001978445.1_Burkholderia_pseudomallei_NAU14A_4_Contig_ST326	GCA_001978445	yes	no	no	no
GCA_001978635.1_Burkholderia_pseudomallei_NAU14B_9_Contig_ST326	GCA_001978635	yes	no	no	no
GCA_001978565.1_Burkholderia_pseudomallei_NAU14B_3_Contig_ST326	GCA_001978565	yes	no	no	no
GCA_001978515.1_Burkholderia_pseudomallei_NAU14B_1_Contig_ST326	GCA_001978515	yes	no	no	no
GCA_001978265.1_Burkholderia_pseudomallei_NAU2B_6_Contig_ST326	GCA_001978265	yes	no	no	no
GCA_001978285.1_Burkholderia_pseudomallei_NAU2B_5_Contig_ST326	GCA_001978285	yes	no	no	no
GCA_001978875.1_Burkholderia_pseudomallei_NAU24B_3_Contig_ST326	GCA_001978875	yes	no	no	no
GCA_001978925.1_Burkholderia_pseudomallei_NAU35A_2_Contig_ST326	GCA_001978925	yes	no	no	no
GCA_001980565.1_Burkholderia_pseudomallei_NAU33A_4_Contig_ST326	GCA_001980565	yes	no	no	no
GCA_001978345.1_Burkholderia_pseudomallei_NAU2B_9_Contig_ST326	GCA_001978345	yes	no	no	no
GCA_001978325.1_Burkholderia_pseudomallei_NAU2B_11_Contig_ST326	GCA_001978325	yes	no	no	no
GCA_001978295.1_Burkholderia_pseudomallei_NAU2B_8_Contig_ST326	GCA_001978295	yes	no	no	no
GCA_001978935.1_Burkholderia_pseudomallei_NAU35A_4_Contig_ST326	GCA_001978935	yes	no	no	no
GCA_001976905.1_Burkholderia_pseudomallei_RF43_BP22_Contig_ST326	GCA_001976905	yes	no	no	no
GCA_001445635.1_Burkholderia_pseudomallei_RF43Bp22_Contig_ST326	GCA_001445635	yes	no	no	no
GCA_001446005.1_Burkholderia_pseudomallei_NAU24B3_Contig_ST326	GCA_001446005	yes	no	no	no
GCA_001978415.1_Burkholderia_pseudomallei_NAU14A_2_Contig_ST326	GCA_001978415	yes	no	no	no
GCA_001445975.1_Burkholderia_pseudomallei_NAU14B6_Contig_ST326	GCA_001445975	yes	no	no	no
GCA_001978455.1_Burkholderia_pseudomallei_NAU14A_5_Contig_ST326	GCA_001978455	yes	no	no	no
GCA_001978615.1_Burkholderia_pseudomallei_NAU14B_8_Contig_ST326	GCA_001978615	yes	no	no	no
GCA_001978605.1_Burkholderia_pseudomallei_NAU14B_6_Contig_ST326	GCA_001978605	yes	no	no	no
GCA_001978905.1_Burkholderia_pseudomallei_NAU33A_6_Contig_ST326	GCA_001978905	yes	no	no	no
GCA_001979015.1_Burkholderia_pseudomallei_NAU35B_4_Contig_ST326	GCA_001979015	yes	no	no	no
GCA_001978725.1_Burkholderia_pseudomallei_NAU20B_8_Contig_ST326	GCA_001978725	yes	no	no	no
GCA_001978385.1_Burkholderia_pseudomallei_NAU2B_12_Contig_ST326	GCA_001978385	yes	no	no	no
GCA_001978825.1_Burkholderia_pseudomallei_NAU22A_3_Contig_ST326	GCA_001978825	yes	no	no	no
GCA_001978675.1_Burkholderia_pseudomallei_NAU20B_5_Contig_ST326	GCA_001978675	yes	no	no	no
GCA_001978705.1_Burkholderia_pseudomallei_NAU20B_2_Contig_ST326	GCA_001978705	yes	no	no	no
GCA_000773335.1_Burkholderia_pseudomallei_MSHR5596_Contig_ST1027	GCA_000773335	yes	no	no	no
GCA_001978205.1_Burkholderia_pseudomallei_MSHR0776_Contig_ST150	GCA_001978205	yes	no	no	no
GCA_001979995.1_Burkholderia_pseudomallei_MSHR1079_Contig_ST111	GCA_001979995	yes	no	no	no
GCA_000775095.1_Burkholderia_pseudomallei_TSV5_Contig_ST814	GCA_000775095	yes	no	no	no
GCA_000775105.1_Burkholderia_pseudomallei_TSV32_Contig_ST817	GCA_000775105	yes	no	no	no
GCA_001980275.1_Burkholderia_pseudomallei_MSHR4301_Contig_ST1044	GCA_001980275	yes	no	no	no
GCA_001979895.1_Burkholderia_pseudomallei_MSHR0232_Contig_ST260	GCA_001979895	yes	no	no	no
GCA_001980065.1_Burkholderia_pseudomallei_MSHR0296_Contig_ST260	GCA_001980065	yes	no	no	no
GCA_000494855.1_Burkholderia_pseudomallei_NCTC_13179_Complete_Genome_ST613	GCA_000494855	yes	no	no	no
GCA_001446075.1_Burkholderia_pseudomallei_NCTC_13179_Contig_ST613	GCA_001446075	yes	no	no	no
GCA_000583835.1_Burkholderia_pseudomallei_MSHR520_Complete_Genome_ST36	GCA_000583835	yes	no	no	no
GCA_001975125.1_Burkholderia_pseudomallei_MSHR4083_Complete_Genome_ST36	GCA_001975125	yes	no	no	no
GCA_001975145.1_Burkholderia_pseudomallei_MSHR3763_Complete_Genome_ST36	GCA_001975145	yes	no	no	no
GCA_000439695.1_Burkholderia_pseudomallei_MSHR305_Complete_Genome_ST36	GCA_000439695	yes	no	no	no
GCA_000169715.1_Burkholderia_pseudomallei_305_Contig_ST36	GCA_000169715	yes	no	no	no
GCA_000755765.1_Burkholderia_pseudomallei_BDP_Complete_Genome_ST36	GCA_000755765	yes	no	no	no
GCA_001980155.1_Burkholderia_pseudomallei_MSHR3662_Contig_ST808	GCA_001980155	yes	no	no	no
GCA_001980315.1_Burkholderia_pseudomallei_MSHR4504_Contig_ST1022	GCA_001980315	yes	no	no	no
GCA_000773145.1_Burkholderia_pseudomallei_MSHR7343_Contig_ST1030	GCA_000773145	yes	no	no	no
GCA_000773085.1_Burkholderia_pseudomallei_MSHR5608_Contig_ST1028	GCA_000773085	yes	no	no	no
GCA_000773365.1_Burkholderia_pseudomallei_MSHR7334_Contig_ST970	GCA_000773365	yes	no	no	no
GCA_001980485.1_Burkholderia_pseudomallei_MSHR4750_Contig_ST453	GCA_001980485	yes	no	no	no
GCA_001980385.1_Burkholderia_pseudomallei_MSHR4735_Contig_ST453	GCA_001980385	yes	no	no	no
GCA_001980395.1_Burkholderia_pseudomallei_MSHR4736_Contig_ST453	GCA_001980395	yes	no	no	no
GCA_001980435.1_Burkholderia_pseudomallei_MSHR4738_Contig_ST453	GCA_001980435	yes	no	no	no
GCA_001980465.1_Burkholderia_pseudomallei_MSHR4749_Contig_ST453	GCA_001980465	yes	no	no	no
GCA_000774185.1_Burkholderia_pseudomallei_MSHR4304_Scaffold_ST995	GCA_000774185	yes	no	no	no
GCA_001979975.1_Burkholderia_pseudomallei_MSHR0347_Contig_ST617	GCA_001979975	yes	no	no	no
GCA_001978765.1_Burkholderia_pseudomallei_NAU21B_3_Contig_ST617	GCA_001978765	yes	no	no	no
GCA_001978785.1_Burkholderia_pseudomallei_NAU21B_7_Contig_ST617	GCA_001978785	yes	no	no	no
GCA_001978745.1_Burkholderia_pseudomallei_NAU21B_4_Contig_ST617	GCA_001978745	yes	no	no	no
GCA_001445985.1_Burkholderia_pseudomallei_NAU20B16_Contig_ST617	GCA_001445985	yes	no	no	no
GCA_001978795.1_Burkholderia_pseudomallei_NAU21B_11_Contig_ST617	GCA_001978795	yes	no	no	no
GCA_000511915.1_Burkholderia_pseudomallei_NAU20B_16_Complete_Genome_ST617	GCA_000511915	yes	no	no	no
GCA_001979945.1_Burkholderia_pseudomallei_MSHR0295_Contig_ST617	GCA_001979945	yes	no	no	no
GCA_000521645.1_Burkholderia_pseudomallei_MSHR146_Complete_Genome_ST617	GCA_000521645	yes	no	no	no
GCA_000520895.1_Burkholderia_pseudomallei_MSHR511_Complete_Genome_ST617	GCA_000520895	yes	no	no	no
GCA_001978365.1_Burkholderia_pseudomallei_NAU13B_1_Contig_ST617	GCA_001978365	yes	no	no	no
GCA_001979905.1_Burkholderia_pseudomallei_MSHR0200_Contig_ST617	GCA_001979905	yes	no	no	no
GCA_000773275.1_Burkholderia_pseudomallei_MSHR4378_Contig_ST1025	GCA_000773275	yes	no	no	no
GCA_001977345.1_Burkholderia_pseudomallei_MSHR0644_Contig_ST	GCA_001977345	yes	no	no	no
GCA_001980125.1_Burkholderia_pseudomallei_MSHR2825_Contig_ST642	GCA_001980125	yes	no	no	no
GCA_001979275.1_Burkholderia_pseudomallei_MSHR1286_Contig_ST473	GCA_001979275	yes	no	no	no
GCA_000774275.1_Burkholderia_pseudomallei_MSHR4300_Scaffold_ST149	GCA_000774275	yes	no	no	no
GCA_001977365.1_Burkholderia_pseudomallei_MSHR0503_Contig_ST149	GCA_001977365	yes	no	no	no
GCA_001980515.1_Burkholderia_pseudomallei_DW10_Contig_ST333	GCA_001980515	yes	no	no	no
GCA_001980545.1_Burkholderia_pseudomallei_DW7_Contig_ST	GCA_001980545	yes	no	no	no
GCA_001979325.1_Burkholderia_pseudomallei_MSHR1300_Contig_ST333	GCA_001979325	yes	no	no	no
GCA_001980495.1_Burkholderia_pseudomallei_MSHR1141_Contig_ST333	GCA_001980495	yes	no	no	no
GCA_000773215.1_Burkholderia_pseudomallei_MSHR5569_Contig_ST885	GCA_000773215	yes	no	no	no
GCA_001979065.1_Burkholderia_pseudomallei_NAU44A_9_Contig_ST266	GCA_001979065	yes	no	no	no
GCA_001979045.1_Burkholderia_pseudomallei_NAU44A_6_Contig_ST266	GCA_001979045	yes	no	no	no
GCA_001446035.1_Burkholderia_pseudomallei_NAU44A6_Contig_ST266	GCA_001446035	yes	no	no	no
GCA_001978995.1_Burkholderia_pseudomallei_NAU44A_2_Contig_ST266	GCA_001978995	yes	no	no	no
GCA_000773355.1_Burkholderia_pseudomallei_MSHR7498_Contig_ST766	GCA_000773355	yes	no	no	no
GCA_000959225.1_Burkholderia_pseudomallei_MSHR2543_Complete_Genome_ST573	GCA_000959225	yes	no	no	no
GCA_000770495.1_Burkholderia_pseudomallei_TSV_48_Complete_Genome_ST252	GCA_000770495	yes	no	no	no
GCA_001980175.1_Burkholderia_pseudomallei_MSHR3841_Contig_ST335	GCA_001980175	yes	no	no	no
GCA_000773235.1_Burkholderia_pseudomallei_ABCPW_107_Contig_ST1024	GCA_000773235	yes	no	no	no
GCA_001979085.1_Burkholderia_pseudomallei_MSHR0099_Contig_ST135	GCA_001979085	yes	no	no	no
GCA_001979105.1_Burkholderia_pseudomallei_MSHR0073_Contig_ST135	GCA_001979105	yes	no	no	no
GCA_001979405.1_Burkholderia_pseudomallei_MSHR1888_Contig_ST245	GCA_001979405	yes	no	no	no
GCA_000445385.1_Burkholderia_pseudomallei_MSHR338_Contig_ST243	GCA_000445385	yes	no	no	no
GCA_000182585.2_Burkholderia_pseudomallei_MSHR346_Chromosome_ST243	GCA_000182585	yes	no	no	no
GCA_001979495.1_Burkholderia_pseudomallei_MSHR0376_Contig_ST243	GCA_001979495	yes	no	no	no
GCA_001978165.1_Burkholderia_pseudomallei_MSHR0487_Contig_ST243	GCA_001978165	yes	no	no	no
GCA_001979485.1_Burkholderia_pseudomallei_MSHR0391_Contig_ST243	GCA_001979485	yes	no	no	no
GCA_001979545.1_Burkholderia_pseudomallei_MSHR0443_Contig_ST243	GCA_001979545	yes	no	no	no
GCA_001979765.1_Burkholderia_pseudomallei_MSHR2845_Contig_ST243	GCA_001979765	yes	no	no	no
GCA_001979805.1_Burkholderia_pseudomallei_MSHR2849_Contig_ST243	GCA_001979805	yes	no	no	no
GCA_001977325.1_Burkholderia_pseudomallei_MSHR0730_Contig_ST103	GCA_001977325	yes	no	no	no
GCA_001979385.1_Burkholderia_pseudomallei_MSHR1088_Contig_ST259	GCA_001979385	yes	no	no	no
GCA_001980075.1_Burkholderia_pseudomallei_MSHR0120_Contig_ST259	GCA_001980075	yes	no	no	no
GCA_001980265.1_Burkholderia_pseudomallei_MSHR3974_Contig_ST846	GCA_001980265	yes	no	no	no
GCA_000773345.1_Burkholderia_pseudomallei_MSHR3997_Contig_ST	GCA_000773345	yes	no	no	no
GCA_001980215.1_Burkholderia_pseudomallei_MSHR3998_Contig_ST848	GCA_001980215	yes	no	no	no
GCA_001979415.1_Burkholderia_pseudomallei_MSHR1879_Contig_ST332	GCA_001979415	yes	no	no	no
GCA_001979885.1_Burkholderia_pseudomallei_MSHR1289_Contig_ST131	GCA_001979885	yes	no	no	no
GCA_000347975.1_Burkholderia_pseudomallei_MSHR1043_Contig_ST131	GCA_000347975	yes	no	no	no
GCA_001979175.1_Burkholderia_pseudomallei_MSHR1048_Contig_ST131	GCA_001979175	yes	no	no	no
GCA_001979345.1_Burkholderia_pseudomallei_MSHR0087_Contig_ST131	GCA_001979345	yes	no	no	no
GCA_001979215.1_Burkholderia_pseudomallei_MSHR1218_Contig_ST131	GCA_001979215	yes	no	no	no
GCA_001979285.1_Burkholderia_pseudomallei_MSHR1290_Contig_ST131	GCA_001979285	yes	no	no	no
GCA_001979615.1_Burkholderia_pseudomallei_MSHR1676_Contig_ST131	GCA_001979615	yes	no	no	no
GCA_001979725.1_Burkholderia_pseudomallei_MSHR1684_Contig_ST131	GCA_001979725	yes	no	no	no
GCA_000756165.1_Burkholderia_pseudomallei_MSHR1655_Complete_Genome_ST131	GCA_000756165	yes	no	no	no
GCA_001979255.1_Burkholderia_pseudomallei_MSHR1821_Contig_ST131	GCA_001979255	yes	no	no	no
GCA_001979835.1_Burkholderia_pseudomallei_MSHR3106_Contig_ST131	GCA_001979835	yes	no	no	no
GCA_001979335.1_Burkholderia_pseudomallei_MSHR3042_Contig_ST131	GCA_001979335	yes	no	no	no
GCA_001979865.1_Burkholderia_pseudomallei_MSHR3030_Contig_ST131	GCA_001979865	yes	no	no	no
GCA_001980365.1_Burkholderia_pseudomallei_MSHR4638_Contig_ST131	GCA_001980365	yes	no	no	no
GCA_001979585.1_Burkholderia_pseudomallei_MSHR1672_Contig_ST131	GCA_001979585	yes	no	no	no
GCA_001979595.1_Burkholderia_pseudomallei_MSHR1677_Contig_ST131	GCA_001979595	yes	no	no	no
GCA_001979695.1_Burkholderia_pseudomallei_MSHR1683_Contig_ST131	GCA_001979695	yes	no	no	no
GCA_001979645.1_Burkholderia_pseudomallei_MSHR1678_Contig_ST131	GCA_001979645	yes	no	no	no
GCA_001979245.1_Burkholderia_pseudomallei_MSHR1418_Contig_ST131	GCA_001979245	yes	no	no	no
GCA_001979815.1_Burkholderia_pseudomallei_MSHR3107_Contig_ST131	GCA_001979815	yes	no	no	no
GCA_001979675.1_Burkholderia_pseudomallei_MSHR1682_Contig_ST131	GCA_001979675	yes	no	no	no
GCA_001979755.1_Burkholderia_pseudomallei_MSHR1688_Contig_ST131	GCA_001979755	yes	no	no	no
GCA_001979665.1_Burkholderia_pseudomallei_MSHR1679_Contig_ST131	GCA_001979665	yes	no	no	no
GCA_001979745.1_Burkholderia_pseudomallei_MSHR1685_Contig_ST131	GCA_001979745	yes	no	no	no
GCA_001980335.1_Burkholderia_pseudomallei_MSHR4637_Contig_ST131	GCA_001980335	yes	no	no	no
GCA_001979565.1_Burkholderia_pseudomallei_MSHR1670_Contig_ST131	GCA_001979565	yes	no	no	no
GCA_001979505.1_Burkholderia_pseudomallei_MSHR1660_Contig_ST131	GCA_001979505	yes	no	no	no
GCA_000775085.1_Burkholderia_pseudomallei_TSV28_Contig_ST815	GCA_000775085	yes	no	no	no
GCA_000714875.1_Burkholderia_pseudomallei_MSHR5855_Contig_ST553	GCA_000714875	yes	no	no	no
GCA_000756065.1_Burkholderia_pseudomallei_MSHR5855_Complete_Genome_ST553	GCA_000756065	yes	no	no	no
GCA_000452965.1_Burkholderia_pseudomallei_MSHR5848_Contig_ST553	GCA_000452965	yes	no	no	no
GCA_000755965.1_Burkholderia_pseudomallei_MSHR5848_Complete_Genome_ST553	GCA_000755965	yes	no	no	no
GCA_001887555.1_Burkholderia_pseudomallei_Burk178_Type1_Complete_Genome_ST553	GCA_001887555	yes	no	no	no
GCA_001887575.1_Burkholderia_pseudomallei_Burk178_Type2_Complete_Genome_ST553	GCA_001887575	yes	no	no	no
GCA_001445865.1_Burkholderia_pseudomallei_MSHR1950_Contig_ST1074	GCA_001445865	yes	no	no	no
GCA_000932095.1_Burkholderia_pseudomallei_QCMRI_BP28_Contig_ST442	GCA_000932095	yes	no	no	no
GCA_000648335.1_Burkholderia_pseudomallei_PB08298010_Contig_ST426	GCA_000648335	yes	no	no	no
GCA_000959345.1_Burkholderia_pseudomallei_PB08298010_Complete_Genome_ST426	GCA_000959345	yes	no	no	no
GCA_001980655.1_Burkholderia_pseudomallei_MSHR5104_Contig_ST881	GCA_001980655	yes	no	no	no
GCA_001980675.1_Burkholderia_pseudomallei_MSHR5105_Contig_ST881	GCA_001980675	yes	no	no	no
GCA_001980585.1_Burkholderia_pseudomallei_MSHR5089_Contig_ST881	GCA_001980585	yes	no	no	no
GCA_001980605.1_Burkholderia_pseudomallei_MSHR5093_Contig_ST881	GCA_001980605	yes	no	no	no
GCA_001976255.1_Burkholderia_pseudomallei_2002721772_Contig_ST418	GCA_001976255	yes	no	no	no
GCA_001976475.1_Burkholderia_pseudomallei_4027a_Contig_ST	GCA_001976475	yes	no	no	no
GCA_000981285.2_Burkholderia_pseudomallei_cm_manipal_Contig_ST	GCA_000981285	yes	no	no	no
GCA_002111365.1_Burkholderia_pseudomallei_2008724758_Complete_Genome_ST550	GCA_002111365	yes	no	no	no
GCA_001695735.1_Burkholderia_pseudomallei_MS_Complete_Genome_ST1034	GCA_001695735	yes	no	no	no
GCA_000182195.1_Burkholderia_pseudomallei_576_Contig_ST501	GCA_000182195	yes	no	no	no
GCA_000756185.1_Burkholderia_pseudomallei_576_Complete_Genome_ST501	GCA_000756185	yes	no	no	no
GCA_001976345.1_Burkholderia_pseudomallei_3943a_Contig_ST300	GCA_001976345	yes	no	no	no
GCA_001977425.1_Burkholderia_pseudomallei_RF4_BP80_Contig_ST392	GCA_001977425	yes	no	no	no
GCA_001976785.1_Burkholderia_pseudomallei_3997a_Contig_ST	GCA_001976785	yes	no	no	no
GCA_001277875.1_Burkholderia_pseudomallei_vgh16R_Complete_Genome_ST1001	GCA_001277875	yes	no	no	no
GCA_001277895.1_Burkholderia_pseudomallei_vgh16W_Complete_Genome_ST1001	GCA_001277895	yes	no	no	no
GCA_001977275.1_Burkholderia_pseudomallei_Ubon_P45_Bp30_Contig_ST671	GCA_001977275	yes	no	no	no
GCA_001978175.1_Burkholderia_pseudomallei_Ubon_P45_Bp25_Contig_ST	GCA_001978175	yes	no	no	no
GCA_001981135.1_Burkholderia_pseudomallei_3964c_Contig_ST671	GCA_001981135	yes	no	no	no
GCA_001981085.1_Burkholderia_pseudomallei_3964b_Contig_ST671	GCA_001981085	yes	no	no	no
GCA_001981125.1_Burkholderia_pseudomallei_3964d_Contig_ST671	GCA_001981125	yes	no	no	no
GCA_002113945.1_Burkholderia_pseudomallei_2014002816_Contig_ST1053	GCA_002113945	yes	no	no	no
GCA_002111105.1_Burkholderia_pseudomallei_2002734728_Complete_Genome_ST518	GCA_002111105	yes	no	no	no
GCA_002111205.1_Burkholderia_pseudomallei_2013746777_Complete_Genome_ST518	GCA_002111205	yes	no	no	no
GCA_000648355.1_Burkholderia_pseudomallei_4900CFPatient1_Contig_ST92	GCA_000648355	yes	no	no	no
GCA_002111145.1_Burkholderia_pseudomallei_2010007509_Complete_Genome_ST518	GCA_002111145	yes	no	no	no
GCA_000959265.1_Burkholderia_pseudomallei_7894_Complete_Genome_ST11	GCA_000959265	yes	no	no	no
GCA_001976195.1_Burkholderia_pseudomallei_2002721183_Contig_ST11	GCA_001976195	yes	no	no	no
GCA_002111085.1_Burkholderia_pseudomallei_2002721184_Complete_Genome_ST11	GCA_002111085	yes	no	no	no
GCA_002110925.1_Burkholderia_pseudomallei_2002721684_Chromosome_ST297	GCA_002110925	yes	no	no	no
GCA_001885195.1_Burkholderia_pseudomallei_VB976100_Complete_Genome_ST436	GCA_001885195	yes	no	no	no
GCA_002111305.1_Burkholderia_pseudomallei_3000465972_Complete_Genome_ST436	GCA_002111305	yes	no	no	no
GCA_002111005.1_Burkholderia_pseudomallei_2013746878_Complete_Genome_ST1038	GCA_002111005	yes	no	no	no
GCA_002111245.1_Burkholderia_pseudomallei_2013746877_Complete_Genome_ST1038	GCA_002111245	yes	no	no	no
GCA_002111345.1_Burkholderia_pseudomallei_2002721171_Complete_Genome_ST12	GCA_002111345	yes	no	no	no
GCA_002111125.1_Burkholderia_pseudomallei_2008724860_Complete_Genome_ST698	GCA_002111125	yes	no	no	no
GCA_002115385.1_Burkholderia_pseudomallei_2008724644_Contig_ST698	GCA_002115385	yes	no	no	no
GCA_002111045.1_Burkholderia_pseudomallei_3000015237_Complete_Genome_ST951	GCA_002111045	yes	no	no	no
GCA_002111385.1_Burkholderia_pseudomallei_3000015486_Complete_Genome_ST92	GCA_002111385	yes	no	no	no
GCA_002111285.1_Burkholderia_pseudomallei_3000047530_Complete_Genome_ST92	GCA_002111285	yes	no	no	no
GCA_002110945.1_Burkholderia_pseudomallei_2008724734_Complete_Genome_ST95	GCA_002110945	yes	no	no	no
GCA_002111165.1_Burkholderia_pseudomallei_2011756189_Complete_Genome_ST92	GCA_002111165	yes	no	no	no
GCA_002110965.1_Burkholderia_pseudomallei_2011756295_Complete_Genome_ST297	GCA_002110965	yes	no	no	yes
GCA_002110985.1_Burkholderia_pseudomallei_2011756296_Chromosome_ST297	GCA_002110985	yes	no	no	yes
GCA_002111025.1_Burkholderia_pseudomallei_2013833055_Complete_Genome_ST297	GCA_002111025	yes	no	no	yes
GCA_002111265.1_Burkholderia_pseudomallei_2013833057_Complete_Genome_ST297	GCA_002111265	yes	no	no	yes
GCA_002111325.1_Burkholderia_pseudomallei_2002721123_Complete_Genome_ST92	GCA_002111325	yes	no	no	yes
GCA_002111065.1_Burkholderia_pseudomallei_2002721100_Chromosome_ST	GCA_002111065	yes	no	no	yes
GCA_001976675.1_Burkholderia_pseudomallei_4263b_Contig_ST	GCA_001976675	yes	no	no	no
GCA_000259755.1_Burkholderia_pseudomallei_1258a_Contig_ST221	GCA_000259755	yes	no	no	no
GCA_000259775.1_Burkholderia_pseudomallei_1258b_Contig_ST221	GCA_000259775	yes	no	no	no
GCA_001976335.1_Burkholderia_pseudomallei_4151a_Contig_ST288	GCA_001976335	yes	no	no	no
GCA_001637015.1_Burkholderia_pseudomallei_NAU21B_13_Contig_ST174	GCA_001637015	yes	no	no	no
GCA_001980995.1_Burkholderia_pseudomallei_2374a_Contig_ST174	GCA_001980995	yes	no	no	no
GCA_001976725.1_Burkholderia_pseudomallei_4187a_Contig_ST17	GCA_001976725	yes	no	no	no
GCA_001977095.1_Burkholderia_pseudomallei_319a_Contig_ST17	GCA_001977095	yes	no	no	no
GCA_001976895.1_Burkholderia_pseudomallei_RF49_BP2_Contig_ST526	GCA_001976895	yes	no	no	no
GCA_000259795.1_Burkholderia_pseudomallei_354e_Contig_ST78	GCA_000259795	yes	no	no	no
GCA_001976575.1_Burkholderia_pseudomallei_4114a_Contig_ST23	GCA_001976575	yes	no	no	no
GCA_000350505.1_Burkholderia_pseudomallei_NCTC_13392_Contig_ST23	GCA_000350505	yes	no	no	no
GCA_000464685.1_Burkholderia_pseudomallei_NCTC_13392_morphotype_10_Contig_ST23	GCA_000464685	yes	no	no	no
GCA_000454565.1_Burkholderia_pseudomallei_NCTC_13392_morphotype_1_Contig_ST23	GCA_000454565	yes	no	no	no
GCA_000454705.1_Burkholderia_pseudomallei_NCTC_13392_morphotype_8_Contig_ST23	GCA_000454705	yes	no	no	no
GCA_000454585.1_Burkholderia_pseudomallei_NCTC_13392_morphotype_6_Contig_ST23	GCA_000454585	yes	no	no	no
GCA_000454605.1_Burkholderia_pseudomallei_NCTC_13392_morphotype_3_Contig_ST23	GCA_000454605	yes	no	no	no
GCA_000454665.1_Burkholderia_pseudomallei_NCTC_13392_morphotype_7_Contig_ST23	GCA_000454665	yes	no	no	no
GCA_000454685.1_Burkholderia_pseudomallei_NCTC_13392_morphotype_9_Contig_ST23	GCA_000454685	yes	no	no	no
GCA_000454625.1_Burkholderia_pseudomallei_NCTC_13392_morphotype_2_Contig_ST23	GCA_000454625	yes	no	no	no
GCA_000454645.1_Burkholderia_pseudomallei_NCTC_13392_morphotype_5_Contig_ST23	GCA_000454645	yes	no	no	no
GCA_001976755.1_Burkholderia_pseudomallei_3944b_Contig_ST9	GCA_001976755	yes	no	no	no
GCA_001977475.1_Burkholderia_pseudomallei_RF49_BP7_Contig_ST9	GCA_001977475	yes	no	no	no
GCA_000959285.1_Burkholderia_pseudomallei_K96243_Complete_Genome_ST10	GCA_000959285	yes	no	no	no
GCA_000011545.1_Burkholderia_pseudomallei_K96243_Complete_Genome_ST10	GCA_000011545	yes	no	no	no
GCA_001981185.1_Burkholderia_pseudomallei_4226b_Contig_ST306	GCA_001981185	yes	no	no	no
GCA_001981195.1_Burkholderia_pseudomallei_4226c_Contig_ST306	GCA_001981195	yes	no	no	no
GCA_001976275.1_Burkholderia_pseudomallei_3904b_Contig_ST206	GCA_001976275	yes	no	no	no
GCA_002111225.1_Burkholderia_pseudomallei_2013746811_Complete_Genome_ST17	GCA_002111225	yes	no	no	no
GCA_001980695.1_Burkholderia_pseudomallei_5598b_Contig_ST78	GCA_001980695	yes	no	no	no
GCA_001980735.1_Burkholderia_pseudomallei_5598ci_Contig_ST78	GCA_001980735	yes	no	no	no
GCA_001980725.1_Burkholderia_pseudomallei_316a_Contig_ST17	GCA_001980725	yes	no	no	no
GCA_001980755.1_Burkholderia_pseudomallei_316c_Contig_ST17	GCA_001980755	yes	no	no	no
GCA_001980895.1_Burkholderia_pseudomallei_942a_Contig_ST17	GCA_001980895	yes	no	no	no
GCA_001977565.1_Burkholderia_pseudomallei_RF61_BP2_Contig_ST17	GCA_001977565	yes	no	no	no
GCA_001977605.1_Burkholderia_pseudomallei_RF63_BP1_Contig_ST17	GCA_001977605	yes	no	no	no
GCA_000410895.1_Burkholderia_pseudomallei_406e_Contig_ST211	GCA_000410895	yes	no	no	no
GCA_000755825.1_Burkholderia_pseudomallei_BSR_Complete_Genome_ST211	GCA_000755825	yes	no	no	no
GCA_000959145.1_Burkholderia_pseudomallei_406e_Complete_Genome_ST211	GCA_000959145	yes	no	no	no
GCA_001980835.1_Burkholderia_pseudomallei_577d_Contig_ST708	GCA_001980835	yes	no	no	no
GCA_001980805.1_Burkholderia_pseudomallei_577cii_Scaffold_ST708	GCA_001980805	yes	no	no	no
GCA_001980815.1_Burkholderia_pseudomallei_577ci_Contig_ST708	GCA_001980815	yes	no	no	no
GCA_001977375.1_Burkholderia_pseudomallei_4210a_Contig_ST169	GCA_001977375	yes	no	no	no
GCA_001977675.1_Burkholderia_pseudomallei_NRF77_BP3_Contig_ST	GCA_001977675	yes	no	no	no
GCA_001233045.1_Burkholderia_pseudomallei_23_96_Contig_ST51	GCA_001233045	yes	no	no	no
GCA_001445855.1_Burkholderia_pseudomallei_Gu1909a_Contig_ST	GCA_001445855	yes	no	no	no
GCA_001979435.1_Burkholderia_pseudomallei_GU_1909A_Contig_ST	GCA_001979435	yes	no	no	no
GCA_001980625.1_Burkholderia_pseudomallei_MSHR5086_Contig_ST658	GCA_001980625	yes	no	no	no
GCA_001980645.1_Burkholderia_pseudomallei_MSHR5100_Contig_ST658	GCA_001980645	yes	no	no	no
GCA_001977655.1_Burkholderia_pseudomallei_RF68_BP5_Contig_ST	GCA_001977655	yes	no	no	no
GCA_001976465.1_Burkholderia_pseudomallei_2002721789_Contig_ST84	GCA_001976465	yes	no	no	no
GCA_001976405.1_Burkholderia_pseudomallei_2002721785_Contig_ST84	GCA_001976405	yes	no	no	no
GCA_001976185.1_Burkholderia_pseudomallei_2002721784_Contig_ST84	GCA_001976185	yes	no	no	no
GCA_001976245.1_Burkholderia_pseudomallei_2002721787_Contig_ST84	GCA_001976245	yes	no	no	no
GCA_001976385.1_Burkholderia_pseudomallei_2002721786_Contig_ST84	GCA_001976385	yes	no	no	no
GCA_001446175.1_Burkholderia_pseudomallei_Songkhla34W2_Contig_ST84	GCA_001446175	yes	no	no	no
GCA_001976175.1_Burkholderia_pseudomallei_2002721712_Contig_ST84	GCA_001976175	yes	no	no	no
GCA_001976265.1_Burkholderia_pseudomallei_2002721788_Contig_ST84	GCA_001976265	yes	no	no	no
GCA_001976165.1_Burkholderia_pseudomallei_2002721738_Contig_ST84	GCA_001976165	yes	no	no	no
GCA_001976395.1_Burkholderia_pseudomallei_2002721741_Contig_ST84	GCA_001976395	yes	no	no	no
GCA_001976415.1_Burkholderia_pseudomallei_2002721740_Contig_ST84	GCA_001976415	yes	no	no	no
GCA_001980915.1_Burkholderia_pseudomallei_975d_Contig_ST873	GCA_001980915	yes	no	no	no
GCA_001976925.1_Burkholderia_pseudomallei_NRF57_BP67_Contig_ST70	GCA_001976925	yes	no	no	no
GCA_001980965.1_Burkholderia_pseudomallei_984a_Contig_ST70	GCA_001980965	yes	no	no	no
GCA_001445875.1_Burkholderia_pseudomallei_RF67BP1_Contig_ST	GCA_001445875	yes	no	no	no
GCA_001977645.1_Burkholderia_pseudomallei_RF67_BP1_Contig_ST	GCA_001977645	yes	no	no	no
GCA_000015925.1_Burkholderia_pseudomallei_1106a_Complete_Genome_ST70	GCA_000015925	yes	no	no	no
GCA_000756125.1_Burkholderia_pseudomallei_Mahidol_1106a_Complete_Genome_ST70	GCA_000756125	yes	no	no	no
GCA_000756145.1_Burkholderia_pseudomallei_1106a_Complete_Genome_ST70	GCA_000756145	yes	no	no	no
GCA_001446115.1_Burkholderia_pseudomallei_RF85Bp37_Contig_ST70	GCA_001446115	yes	no	no	no
GCA_001977725.1_Burkholderia_pseudomallei_RF85_BP37_Contig_ST70	GCA_001977725	yes	no	no	no
GCA_001976565.1_Burkholderia_pseudomallei_4147a_Contig_ST70	GCA_001976565	yes	no	no	no
GCA_001976625.1_Burkholderia_pseudomallei_4169d_Contig_ST507	GCA_001976625	yes	no	no	no
GCA_001976645.1_Burkholderia_pseudomallei_4179a_Contig_ST507	GCA_001976645	yes	no	no	no
GCA_000294635.1_Burkholderia_pseudomallei_BPC006_Complete_Genome_ST70	GCA_000294635	yes	no	no	no
GCA_001445925.1_Burkholderia_pseudomallei_NRF80Bp1_Contig_ST	GCA_001445925	yes	no	no	no
GCA_001977695.1_Burkholderia_pseudomallei_SBCT_RF80_BP1_Contig_ST507	GCA_001977695	yes	no	no	no
GCA_001981055.1_Burkholderia_pseudomallei_2381c_Contig_ST4	GCA_001981055	yes	no	no	no
GCA_001976805.1_Burkholderia_pseudomallei_RF6_BP26_Contig_ST178	GCA_001976805	yes	no	no	no
GCA_001976815.1_Burkholderia_pseudomallei_RF6_BP2_Contig_ST178	GCA_001976815	yes	no	no	no
GCA_001976885.1_Burkholderia_pseudomallei_RF8_BP5_Contig_ST178	GCA_001976885	yes	no	no	no
GCA_001445915.1_Burkholderia_pseudomallei_RF6BP15_Contig_ST178	GCA_001445915	yes	no	no	no
GCA_001976825.1_Burkholderia_pseudomallei_RF6_BP15_Contig_ST178	GCA_001976825	yes	no	no	no
GCA_001976865.1_Burkholderia_pseudomallei_RF8_BP2_Contig_ST227	GCA_001976865	yes	no	no	no
GCA_001976685.1_Burkholderia_pseudomallei_4175a_Contig_ST197	GCA_001976685	yes	no	no	no
GCA_001976975.1_Burkholderia_pseudomallei_NRF60_BP4_Contig_ST	GCA_001976975	yes	no	no	no
GCA_001977575.1_Burkholderia_pseudomallei_NRF60_BP3_Contig_ST	GCA_001977575	yes	no	no	no
GCA_001976735.1_Burkholderia_pseudomallei_4191a_Contig_ST209	GCA_001976735	yes	no	no	no
GCA_000259735.1_Burkholderia_pseudomallei_1026a_Contig_ST102	GCA_000259735	yes	no	no	no
GCA_000260515.1_Burkholderia_pseudomallei_1026b_Complete_Genome_ST102	GCA_000260515	yes	no	no	no
GCA_000756085.1_Burkholderia_pseudomallei_BGR_Complete_Genome_ST102	GCA_000756085	yes	no	no	no
GCA_000959125.1_Burkholderia_pseudomallei_1026b_Complete_Genome_ST102	GCA_000959125	yes	no	no	no
GCA_000452985.1_Burkholderia_pseudomallei_HBPUB10134a_Contig_ST228	GCA_000452985	yes	no	no	no
GCA_000755925.1_Burkholderia_pseudomallei_HBPUB10134a_Complete_Genome_ST228	GCA_000755925	yes	no	no	no
GCA_001977465.1_Burkholderia_pseudomallei_RF49_BP5_Contig_ST309	GCA_001977465	yes	no	no	no
GCA_001976325.1_Burkholderia_pseudomallei_3913a_Contig_ST225	GCA_001976325	yes	no	no	no
GCA_001981165.1_Burkholderia_pseudomallei_4095a_Contig_ST	GCA_001981165	yes	no	no	no
GCA_001981105.1_Burkholderia_pseudomallei_3013c_Contig_ST874	GCA_001981105	yes	no	no	no
GCA_000757015.2_Burkholderia_pseudomallei_PHLS_112_Complete_Genome_ST15	GCA_000757015	yes	no	no	no
GCA_001981045.1_Burkholderia_pseudomallei_2381a_Contig_ST498	GCA_001981045	yes	no	no	no
GCA_001977435.1_Burkholderia_pseudomallei_RF44_BP52_Contig_ST498	GCA_001977435	yes	no	no	no
GCA_001979455.1_Burkholderia_pseudomallei_GU_2143A_Contig_ST498	GCA_001979455	yes	no	no	no
GCA_001976585.1_Burkholderia_pseudomallei_4112a_Contig_ST	GCA_001976585	yes	no	no	no
GCA_000757035.2_Burkholderia_pseudomallei_Pasteur_52237_Complete_Genome_ST411	GCA_000757035	yes	no	no	no
GCA_001977615.1_Burkholderia_pseudomallei_RF63_BP2_Contig_ST177	GCA_001977615	yes	no	no	no
GCA_000012785.1_Burkholderia_pseudomallei_1710b_Complete_Genome_ST177	GCA_000012785	yes	no	no	no
GCA_001978085.1_Burkholderia_pseudomallei_Ubon_P44_Bp11_Contig_ST177	GCA_001978085	yes	no	no	no
GCA_001978105.1_Burkholderia_pseudomallei_Ubon_P44_Bp26_Contig_ST177	GCA_001978105	yes	no	no	no
GCA_001978115.1_Burkholderia_pseudomallei_Ubon_P44_Bp10_Contig_ST177	GCA_001978115	yes	no	no	no
GCA_001978125.1_Burkholderia_pseudomallei_Ubon_P44_Bp34_Contig_ST177	GCA_001978125	yes	no	no	no
GCA_001977265.1_Burkholderia_pseudomallei_Ubon_P23_Bp21_Contig_ST208	GCA_001977265	yes	no	no	no
GCA_001977285.1_Burkholderia_pseudomallei_Ubon_P23_Bp20_Contig_ST208	GCA_001977285	yes	no	no	no
GCA_001978055.1_Burkholderia_pseudomallei_Ubon_P23_Bp38_Contig_ST208	GCA_001978055	yes	no	no	no
GCA_001977545.1_Burkholderia_pseudomallei_NRF57_BP64_Contig_ST670	GCA_001977545	yes	no	no	no
GCA_001977495.1_Burkholderia_pseudomallei_NRF57_BP22_Contig_ST670	GCA_001977495	yes	no	no	no
GCA_001977525.1_Burkholderia_pseudomallei_NRF57_BP62_Contig_ST670	GCA_001977525	yes	no	no	no
GCA_000953095.1_Burkholderia_pseudomallei_3921_Complete_Genome_ST670	GCA_000953095	yes	no	no	no
GCA_001977195.1_Burkholderia_pseudomallei_Ubon_P19_Bp25_Contig_ST670	GCA_001977195	yes	no	no	no
GCA_001977225.1_Burkholderia_pseudomallei_Ubon_P19_Bp45_Contig_ST670	GCA_001977225	yes	no	no	no
GCA_001978045.1_Burkholderia_pseudomallei_Ubon_P19_Bp34_Contig_ST670	GCA_001978045	yes	no	no	no
GCA_001977245.1_Burkholderia_pseudomallei_Ubon_P23_Bp05_Contig_ST670	GCA_001977245	yes	no	no	no
GCA_001977185.1_Burkholderia_pseudomallei_Ubon_P19_Bp57_Contig_ST670	GCA_001977185	yes	no	no	no
GCA_001978015.1_Burkholderia_pseudomallei_Ubon_P19_Bp11_Contig_ST670	GCA_001978015	yes	no	no	no
GCA_001976545.1_Burkholderia_pseudomallei_4108a_Contig_ST158	GCA_001976545	yes	no	no	no
GCA_001977165.1_Burkholderia_pseudomallei_RNS8_BP1_Contig_ST	GCA_001977165	yes	no	no	no
GCA_001976655.1_Burkholderia_pseudomallei_4166a_Contig_ST47	GCA_001976655	yes	no	no	no
GCA_001977385.1_Burkholderia_pseudomallei_4228b_Contig_ST180	GCA_001977385	yes	no	no	no
GCA_001277975.1_Burkholderia_pseudomallei_982_Complete_Genome_ST	GCA_001277975	yes	no	no	no
GCA_001981025.1_Burkholderia_pseudomallei_2374b_Contig_ST304	GCA_001981025	yes	no	no	no
GCA_000954175.1_Burkholderia_pseudomallei_vgh07_Complete_Genome_ST58	GCA_000954175	yes	no	no	no
GCA_001977735.1_Burkholderia_pseudomallei_INT2_BP12_Contig_ST58	GCA_001977735	yes	no	no	no
GCA_001977915.1_Burkholderia_pseudomallei_INT2_BP214_Contig_ST58	GCA_001977915	yes	no	no	no
GCA_001977005.1_Burkholderia_pseudomallei_INT2_BP24_Contig_ST58	GCA_001977005	yes	no	no	no
GCA_001977785.1_Burkholderia_pseudomallei_INT2_BP89_Contig_ST58	GCA_001977785	yes	no	no	no
GCA_001977945.1_Burkholderia_pseudomallei_INT2_BP217_Contig_ST58	GCA_001977945	yes	no	no	no
GCA_001976485.1_Burkholderia_pseudomallei_4069a_Contig_ST48	GCA_001976485	yes	no	no	no
GCA_001977885.1_Burkholderia_pseudomallei_INT2_BP184_Contig_ST93	GCA_001977885	yes	no	no	no
GCA_001977805.1_Burkholderia_pseudomallei_INT2_BP102_Contig_ST93	GCA_001977805	yes	no	no	no
GCA_001977055.1_Burkholderia_pseudomallei_INT2_BP133_Contig_ST93	GCA_001977055	yes	no	no	no
GCA_001977865.1_Burkholderia_pseudomallei_INT2_BP127_Contig_ST93	GCA_001977865	yes	no	no	no
GCA_001977135.1_Burkholderia_pseudomallei_RNS3_Bp1_Contig_ST93	GCA_001977135	yes	no	no	no
GCA_001446125.1_Burkholderia_pseudomallei_RNS3Bp1_Contig_ST93	GCA_001446125	yes	no	no	no
GCA_001977825.1_Burkholderia_pseudomallei_INT2_BP100_Contig_ST93	GCA_001977825	yes	no	no	no
GCA_001977015.1_Burkholderia_pseudomallei_INT2_BP38_Contig_ST93	GCA_001977015	yes	no	no	no
GCA_001977045.1_Burkholderia_pseudomallei_INT2_BP61_Contig_ST93	GCA_001977045	yes	no	no	no
GCA_001980845.1_Burkholderia_pseudomallei_858ai_Contig_ST56	GCA_001980845	yes	no	no	no
GCA_001980885.1_Burkholderia_pseudomallei_858d_Contig_ST56	GCA_001980885	yes	no	no	no
GCA_001976495.1_Burkholderia_pseudomallei_4032a_Contig_ST177	GCA_001976495	yes	no	no	no
GCA_001977815.1_Burkholderia_pseudomallei_INT2_BP105_Contig_ST60	GCA_001977815	yes	no	no	no
GCA_001446155.1_Burkholderia_pseudomallei_RNS7Bp6_Contig_ST60	GCA_001446155	yes	no	no	no
GCA_001977125.1_Burkholderia_pseudomallei_RNS7_Bp6_Contig_ST60	GCA_001977125	yes	no	no	no
GCA_001977085.1_Burkholderia_pseudomallei_INT4_BP18_Contig_ST60	GCA_001977085	yes	no	no	no
GCA_001977875.1_Burkholderia_pseudomallei_INT2_BP175_Contig_ST60	GCA_001977875	yes	no	no	no
GCA_001980775.1_Burkholderia_pseudomallei_402a_Contig_ST60	GCA_001980775	yes	no	no	no
GCA_001980905.1_Burkholderia_pseudomallei_979bi_Contig_ST60	GCA_001980905	yes	no	no	no
GCA_001980985.1_Burkholderia_pseudomallei_979bii_Contig_ST60	GCA_001980985	yes	no	no	no
GCA_001637005.1_Burkholderia_pseudomallei_NAU33A_5_Contig_ST1005	GCA_001637005	yes	no	no	no
GCA_001977975.1_Burkholderia_pseudomallei_INT2_BP235_Contig_ST1005	GCA_001977975	yes	no	no	no
GCA_001977745.1_Burkholderia_pseudomallei_RF87_BP2_Contig_ST	GCA_001977745	yes	no	no	no
GCA_001642555.1_Burkholderia_pseudomallei_PHLS6_Contig_ST46	GCA_001642555	yes	no	no	no
GCA_000453005.1_Burkholderia_pseudomallei_HBPUB10303a_Contig_ST48	GCA_000453005	yes	no	no	no
GCA_000755905.1_Burkholderia_pseudomallei_HBPUB10303a_Complete_Genome_ST48	GCA_000755905	yes	no	no	no
GCA_000452945.1_Burkholderia_pseudomallei_MSHR5858_Contig_ST562	GCA_000452945	yes	no	no	no
GCA_000755945.1_Burkholderia_pseudomallei_MSHR5858_Complete_Genome_ST562	GCA_000755945	yes	no	no	no
GCA_000182445.1_Burkholderia_pseudomallei_Pakistan_9_Contig_ST72	GCA_000182445	yes	no	no	no
GCA_001446095.1_Burkholderia_pseudomallei_PHLS9_Contig_ST72	GCA_001446095	yes	no	no	no
GCA_001980025.1_Burkholderia_pseudomallei_PHLS_9_Contig_ST72	GCA_001980025	yes	no	no	no
ERR298359_MSHR7400_ST92	ERR298359	yes	no	no	no
ERR298357_MSHR7398_ST92	ERR298357	yes	no	no	no
ERR298778_H065460522_ST1492	ERR298778	yes	no	no	no
GCA_000961535.1_Burkholderia_pseudomallei_MSHR5107_Scaffold_ST881	GCA_000961535	yes	no	no	no
GCA_000170595.1_Burkholderia_pseudomallei_BCC215_Contig_ST1355	GCA_000170595	yes	no	no	no
ERR298753_SID1615_ST92	ERR298753	yes	no	no	no
ERR298754_H061740680_ST92	ERR298754	yes	no	no	no
SRR3145394_BF103_ST1121	SRR3145394	yes	no	no	no
SRR3145395_BF111_ST1122	SRR3145395	yes	no	no	no
SRR3145396_BEL2013_ST1043	SRR3145396	yes	no	no	no
ERR298756_NT_20_ST6	ERR298756	yes	no	no	no
SRR3145392_11-1617_ST1054	SRR3145392	yes	no	no	no
SRR3145393_11-1696_ST1053	SRR3145393	yes	no	no	no
ERR298772_H101180656_ST707	ERR298772	yes	no	no	no
ERR351984_IS42705_ST0	ERR351984	yes	no	no	no
ERR298347_MSHR6969_ST82	ERR298347	yes	no	no	no
BURPM-Bp9110-PRsite23hole09try2P1sub1-EN-PRI-2017-064-DW_S14_L001	SRR7457423	yes	no	yes	yes
BURPM-Bp9039-PRsite23hole07P1PLT1S1-EN-PRI-2017-064-DW_S1_L001	SRR7457394	yes	no	yes	yes
BURPM-Bp9116-PRsite23hole09try2P2sub2-EN-PRI-2017-064-DW_S12_L001	SRR7457379	no	no	yes	no
BURPM-Bp9115-PRsite23hole09try2P2sub1-EN-PRI-2017-064-DW_S20_L001	SRR7457374	no	no	yes	no
BURPM-Bp9112-PRsite23hole09try2P1sub3-EN-PRI-2017-064-DW_S16_L001	SRR7457375	no	no	yes	no
BURPM-Bp9111-PRsite23hole09try2P1sub2-EN-PRI-2017-064-DW_S15_L001	SRR7457422	no	no	yes	no
BURPM-Bp9046-PRsite23hole07P1PLT1S8-EN-PRI-2017-064-DW_S5_L001	SRR7457401	no	no	yes	no
BURPM-Bp9047-PRsite23hole07P1PLT1S9-EN-PRI-2017-064-DW_S6_L001	SRR7457400	no	no	yes	no
BURPM-Bp9107-PRsite23hole07try2P1sub1-EN-PRI-2017-064-DW_S18_L001	SRR7457420	no	no	yes	no
BURPM-Bp9055-PRsite23hole07P1PLT1S17-EN-PRI-2017-064-DW_S4_L001	SRR7457473	no	no	yes	no
BURPM-Bp9074-PRsite23hole07P1PLT2S12-EN-PRI-2017-064-DW_S11_L001	SRR7457484	no	no	yes	no
BURPM-Bp9052-PRsite23hole07P1PLT1S14-EN-PRI-2017-064-DW_S4_L001	SRR7457470	no	no	yes	no
BURPM-Bp9041-PRsite23hole07P1PLT1S3-EN-PRI-2017-064-DW_S1_L001	SRR7457397	no	no	yes	no
BURPM-Bp9043-PRsite23hole07P1PLT1S5-EN-PRI-2017-064-DW_S2_L001	SRR7457396	no	no	yes	no
BURPM-Bp9044-PRsite23hole07P1PLT1S6-EN-PRI-2017-064-DW_S3_L001	SRR7457399	no	no	yes	no
BURPM-Bp9045-PRsite23hole07P1PLT1S7-EN-PRI-2017-064-DW_S4_L001	SRR7457398	no	no	yes	no
BURPM-Bp9048-PRsite23hole07P1PLT1S10-EN-PRI-2017-064-DW_S2_L001	SRR7457403	no	no	yes	no
BURPM-Bp9050-PRsite23hole07P1PLT1S12-EN-PRI-2017-064-DW_S7_L001	SRR7457402	no	no	yes	no
BURPM-Bp9051-PRsite23hole07P1PLT1S13-EN-PRI-2017-064-DW_S3_L001	SRR7457469	no	no	yes	no
BURPM-Bp9053-PRsite23hole07P1PLT1S15-EN-PRI-2017-064-DW_S2_L001	SRR7457471	no	no	yes	no
BURPM-Bp9054-PRsite23hole07P1PLT1S16-EN-PRI-2017-064-DW_S3_L001	SRR7457472	no	no	yes	no
BURPM-Bp9056-PRsite23hole07P1PLT1S18-EN-PRI-2017-064-DW_S5_L001	SRR7457476	no	no	yes	no
BURPM-Bp9057-PRsite23hole07P1PLT1S19-EN-PRI-2017-064-DW_S7_L001	SRR7457372	no	no	yes	no
BURPM-Bp9058-PRsite23hole07P1PLT1S20-EN-PRI-2017-064-DW_S5_L001	SRR7457391	no	no	yes	no
BURPM-Bp9059-PRsite23hole07P1PLT1S21-EN-PRI-2017-064-DW_S6_L001	SRR7457474	no	no	yes	no
BURPM-Bp9060-PRsite23hole07P1PLT1S22-EN-PRI-2017-064-DW_S7_L001	SRR7457475	no	no	yes	no
BURPM-Bp9061-PRsite23hole07P1PLT1S23-EN-PRI-2017-064-DW_S1_L001	SRR7457458	no	no	yes	no
BURPM-Bp9062-PRsite23hole07P1PLT1S24-EN-PRI-2017-064-DW_S8_L001	SRR7457457	no	no	yes	no
BURPM-Bp9063-PRsite23hole07P1PLT2S1-EN-PRI-2017-064-DW_S9_L001	SRR7457456	no	no	yes	no
BURPM-Bp9064-PRsite23hole07P1PLT2S2-EN-PRI-2017-064-DW_S10_L001	SRR7457455	no	no	yes	no
BURPM-Bp9065-PRsite23hole07P1PLT2S3-EN-PRI-2017-064-DW_S8_L001	SRR7457454	no	no	yes	no
BURPM-Bp9066-PRsite23hole07P1PLT2S4-EN-PRI-2017-064-DW_S11_L001	SRR7457453	no	no	yes	no
BURPM-Bp9067-PRsite23hole07P1PLT2S5-EN-PRI-2017-064-DW_S6_L001	SRR7457452	no	no	yes	no
BURPM-Bp9068-PRsite23hole07P1PLT2S6-EN-PRI-2017-064-DW_S12_L001	SRR7457451	no	no	yes	no
BURPM-Bp9069-PRsite23hole07P1PLT2S7-EN-PRI-2017-064-DW_S13_L001	SRR7457450	no	no	yes	no
BURPM-Bp9070-PRsite23hole07P1PLT2S8-EN-PRI-2017-064-DW_S8_L001	SRR7457449	no	no	yes	no
BURPM-Bp9071-PRsite23hole07P1PLT2S9-EN-PRI-2017-064-DW_S9_L001	SRR7457485	no	no	yes	no
BURPM-Bp9072-PRsite23hole07P1PLT2S10-EN-PRI-2017-064-DW_S10_L001	SRR7457486	no	no	yes	no
BURPM-Bp9073-PRsite23hole07P1PLT2S11-EN-PRI-2017-064-DW_S9_L001	SRR7457483	no	no	yes	no
BURPM-Bp9075-PRsite23hole07P1PLT2S13-EN-PRI-2017-064-DW_S14_L001	SRR7457481	no	no	yes	no
BURPM-Bp9076-PRsite23hole07P1PLT2S14-EN-PRI-2017-064-DW_S10_L001	SRR7457482	no	no	yes	no
BURPM-Bp9077-PRsite23hole07P1PLT2S15-EN-PRI-2017-064-DW_S15_L001	SRR7457479	no	no	yes	no
BURPM-Bp9078-PRsite23hole07P1PLT2S16-EN-PRI-2017-064-DW_S18_L001	SRR7457480	no	no	yes	no
BURPM-Bp9079-PRsite23hole07P1PLT2S17-EN-PRI-2017-064-DW_S17_L001	SRR7457477	no	no	yes	no
BURPM-Bp9080-PRsite23hole07P1PLT2S18-EN-PRI-2017-064-DW_S16_L001	SRR7457478	no	no	yes	no
BURPM-Bp9081-PRsite23hole07P1PLT2S19-EN-PRI-2017-064-DW_S11_L001	SRR7457319	no	no	yes	no
BURPM-Bp9082-PRsite23hole07P1PLT2S20-EN-PRI-2017-064-DW_S12_L001	SRR7457318	no	no	yes	no
BURPM-Bp9083-PRsite23hole07P1PLT2S21-EN-PRI-2017-064-DW_S13_L001	SRR7457321	no	no	yes	no
BURPM-Bp9084-PRsite23hole07P1PLT2S22-EN-PRI-2017-064-DW_S17_L001	SRR7457320	no	no	yes	no
BURPM-Bp9085-PRsite23hole07P1PLT2S23-EN-PRI-2017-064-DW_S14_L001	SRR7457315	no	no	yes	no
BURPM-Bp9086-PRsite23hole07P1PLT2S24-EN-PRI-2017-064-DW_S15_L001	SRR7457314	no	no	yes	no
BURPM-Bp9108-PRsite23hole07try2P1sub2-EN-PRI-2017-064-DW_S19_L001	SRR7457419	no	no	yes	no
BURPM-Bp9109-PRsite23hole07try2P1sub3-EN-PRI-2017-064-DW_S13_L001	SRR7457418	no	no	yes	no
BURPM-Bp9114-PRsite23hole07try2P2sub2-EN-PRI-2017-064-DW_S20_L001	SRR7457373	no	no	yes	no
BURPM-Bp9113-PRsite23hole07try2P2sub1-EN-PRI-2017-064-DW_S19_L001	SRR7457376	no	no	yes	no
Bp0071_1977116029_oklahomensis	SRR1956428	no	yes	no	no
Bp0072_1974002358_oklahomensis	SRR1956429	no	yes	no	no
Bp0073_2003015869_thailandensis	SRR1956433	no	yes	no	no
Bp0144_RF2-non-BP3_PS4	SRR1956416	no	yes	no	no
Bp0145_RF2-non-BP4_cepacia	SRR1956380	no	yes	no	no
Bp0150_RF2-non-BP9_diffusa	SRR1956417	no	yes	no	no
Bp0159_RF3-non-BP5_cepacia	SRR1956381	no	yes	no	no
Bp0260_RF4-BP95_PS4	SRR1956382	no	yes	no	no
Bp0350_RF6-non-BP1_territorii	SRR1956383	no	yes	no	no
Bp0359_RF7-non-BP1_PS4	SRR1956418	no	yes	no	no
Bp0362_RF7-non-BP4_PS4	SRR1956384	no	yes	no	no
Bp0363_RF7-non-BP5_territorii	SRR1956385	no	yes	no	no
Bp0376_RF8-non-BP2_diffusa	SRR1956386	no	yes	no	no
Bp0379_RF8-non-BP5_territorii	SRR1956387	no	yes	no	no
Bp0398_RF23-BP17_ubonensis	SRR1956476	no	yes	no	no
Bp0400_RF23-BP19_ubonensis	SRR1956355	no	yes	no	no
Bp0422_RF23-BP41_ubonensis	SRR1956435	no	yes	no	no
Bp0439_RF23-BP58_ubonensis	SRR1956356	no	yes	no	no
Bp0450_RF23-BP69_territorii	SRR1956388	no	yes	no	no
Bp0462_RF23-BP81_ubonensis	SRR1956357	no	yes	no	no
Bp0463_RF23-BP82_territorii	SRR1956389	no	yes	no	no
Bp0471_RF23-BP90_ubonensis	SRR1956358	no	yes	no	no
Bp0474_RF23-BP93_ubonensis	SRR1956359	no	yes	no	no
Bp0478_RF25-BP1_ubonensis	SRR1956436	no	yes	no	no
Bp0492_RF32-BP3_ubonensis	SRR1956360	no	yes	no	no
Bp0493_RF32-BP4_ubonensis	SRR1956361	no	yes	no	no
Bp0495_RF32-BP6_ubonensis	SRR1956090	no	yes	no	no
Bp0500_RF32-BP11_ubonensis	SRR1956432	no	yes	no	no
Bp0501_RF32-BP12_latens	SRR1956425	no	yes	no	no
Bp0713_NRF60-BP8_PS5	SRR1956390	no	yes	no	no
Bp1480_INT1-BP31_ubonensis	SRR1956437	no	yes	no	no
Bp1607_INT1-BP158_ubonensis	SRR1956438	no	yes	no	no
Bp1681_INT1-BP232_cepacia	SRR1956391	no	yes	no	no
Bp1682_INT1-BP233_cepacia	SRR1956392	no	yes	no	no
Bp1723_INT1-BP274_ubonensis	SRR1956439	no	yes	no	no
Bp1726_INT1-BP277_cepacia	SRR1956393	no	yes	no	no
Bp2122_INT3-BP97_cepacia	SRR1955951	no	yes	no	no
Bp2123_INT3-BP98_cepacia	SRR1955952	no	yes	no	no
Bp2124_INT3-BP99_cepacia	SRR1955953	no	yes	no	no
Bp2126_INT3-BP101_cepacia	SRR1955954	no	yes	no	no
Bp2129_INT3-BP104_cepacia	SRR1955955	no	yes	no	no
Bp2130_INT3-BP105_cepacia	SRR1955956	no	yes	no	no
Bp2132_INT3-BP107_cepacia	SRR1955957	no	yes	no	no
Bp2133_INT3-BP108_cepacia	SRR1955958	no	yes	no	no
Bp2134_INT3-BP109_cepacia	SRR1955959	no	yes	no	no
Bp2145_INT3-BP120_cepacia	SRR1955968	no	yes	no	no
Bp2146_INT3-BP121_cepacia	SRR1955969	no	yes	no	no
Bp2156_INT3-BP131_cepacia	SRR1955970	no	yes	no	no
Bp2157_INT3-BP132_cepacia	SRR1955971	no	yes	no	no
Bp2158_INT3-BP133_cepacia	SRR1955960	no	yes	no	no
Bp2167_INT3-BP142_cepacia	SRR1955961	no	yes	no	no
Bp2169_INT3-BP144_cepacia	SRR1955962	no	yes	no	no
Bp2181_INT3-BP156_cepacia	SRR1955963	no	yes	no	no
Bp2182_INT3-BP157_cepacia	SRR1955964	no	yes	no	no
Bp2194_INT3-BP169_cepacia	SRR1955965	no	yes	no	no
Bp2202_INT3-BP177_cepacia	SRR1955966	no	yes	no	no
Bp2210_INT3-BP185_cepacia	SRR1955967	no	yes	no	no
Bp2233_INT4-BP16_diffusa	SRR1955950	no	yes	no	no
Bp2852_INT25-BP2_cepacia	SRR1956365	no	yes	no	no
Bp3317_SUB-INT22-BP1_pseudomultivorans	SRR1956098	no	yes	no	no
Bp3318_SUB-INT22-BP2_pseudomultivorans	SRR1956099	no	yes	no	no
Bp3330_SUB-INT23-BP2_pseudomultivorans	SRR1956100	no	yes	no	no
Bp3350_SUB-INT24-BP10_pseudomultivorans	SRR1956101	no	yes	no	no
Bp5365_MSMB43_humptydooensis	CP013380, CP013381, CP013382	no	yes	no	no
Bp6891_MSMB866_diffusa	SRR1956400	no	yes	no	no
Bp6892_MSMB867_ubonensis	SRR1956394	no	yes	no	no
Bp6893_MSMB1136_stagnalis	SRR1956403	no	yes	no	no
Bp6894_MSMB1138_ubonensis	SRR1956440	no	yes	no	no
Bp6895_MSMB1146_ubonensis	SRR1956362	no	yes	no	no
Bp6896_MSMB1151_ubonensis	SRR1956363	no	yes	no	no
Bp6897_MSMB1158_ubonensis	SRR1956364	no	yes	no	no
Bp6898_MSMB1160_ubonensis	SRR1956441	no	yes	no	no
Bp6899_MSMB1164_ubonensis	SRR1956442	no	yes	no	no
Bp6900_MSMB1166_ubonensis	SRR1956443	no	yes	no	no
Bp6901_MSMB1175_ubonensis	SRR1956444	no	yes	no	no
Bp6902_MSMB1182_ubonensis	SRR1956445	no	yes	no	no
Bp6905_MSMB1193_ubonensis	SRR1956446	no	yes	no	no
Bp6906_MSMB1194_ubonensis	SRR1956447	no	yes	no	no
Bp6907_MSMB1200_ubonensis	SRR1956477	no	yes	no	no
Bp6909_ABCPW11_PS5	SRR1956401	no	yes	no	no
Bp6910_MSMB1185_ubonensis	SRR1956478	no	yes	no	no
Bp6911_MSMB1186_ubonensis	SRR1956448	no	yes	no	no
Bp6912_MSMB1199_ubonensis	SRR1956479	no	yes	no	no
Bp6913_MSMB1190_ubonensis	SRR1956449	no	yes	no	no
Bp6914_MSMB1191_ubonensis	SRR1956450	no	yes	no	no
Bp6915_ABCPW-14_PS2	SRR1956497	no	yes	no	no
Bp6916_ABCPW-33_stagnalis	SRR1956402	no	yes	no	no
Bp6917_ABCPW-28_ubonensis	SRR1956451	no	yes	no	no
Bp6993_AZ-3-1-30-S1-D7_vietnamiensis	SRR1956092	no	yes	no	no
Bp6994_AZ-4-2-10-S1-D7_anthina	SRR1955972	no	yes	no	no
Bp6996_AZ-4-2-30-S1-D7_anthina	SRR1955949	no	yes	no	no
Bp6997_LA-2-3-30-S1-D2_PS4	SRR1956419	no	yes	no	no
Bp6998_LA-5-5-30-S1-D2_vietnamiensis	SRR1956093	no	yes	no	no
Bp6999_LA-6-3-30-S1-D2_vietnamiensis	SRR1956094	no	yes	no	no
Bp7000_TSV85_PS1	SRR1956041	no	yes	no	no
Bp7001_TSV86_PS1	SRR1956042	no	yes	no	no
Bp7002_BDU5_PS2	SRR1956103	no	yes	no	no
Bp7003_BDU6_PS2	SRR1956043	no	yes	no	no
Bp7004_BDU8_PS2	SRR1956044	no	yes	no	no
Bp7005_BDU18_PS3	SRR1956045	no	yes	no	no
Bp7006_BDU19_PS3	SRR1956046	no	yes	no	no
Bp7013_FL-1-2-10-S1-D0_vietnamiensis	SRR1956095	no	yes	no	no
Bp7014_FL-1-2-30-S1-D0_lata	SRR1956415	no	yes	no	no
Bp7015_FL-2-1-10-S1-D0_vietnamiensis	SRR1956458	no	yes	no	no
Bp7016_FL-2-2-10-S1-D0_vietnamiensis	SRR1956096	no	yes	no	no
Bp7017_FL-2-2-30-S1-D0_vietnamiensis	SRR1956366	no	yes	no	no
Bp7018_FL-2-3-10-S1-D0_cepacia	SRR1956097	no	yes	no	no
Bp7019_FL-2-3-10-S1-D7_vietnamiensis	SRR1956367	no	yes	no	no
Bp7020_FL-2-3-10-S3-D0_vietnamiensis	SRR1956459	no	yes	no	no
Bp7021_FL-2-3-30-S1-D0_vietnamiensis	SRR1956460	no	yes	no	no
Bp7022_FL-2-4-30-S1-D0_vietnamiensis	SRR1956368	no	yes	no	no
Bp7023_FL-2-5-10-S1-D0_vietnamiensis	SRR1956369	no	yes	no	no
Bp7024_FL-2-5-30-S1-D0_vietnamiensis	SRR1956370	no	yes	no	no
Bp7025_FL-4-2-10-S1-D0_cepacia	SRR1956395	no	yes	no	no
Bp7026_FL-5-1-10-S1-D0_vietnamiensis	SRR1956371	no	yes	no	no
Bp7027_FL-5-2-10-S1-D0_vietnamiensis	SRR1956461	no	yes	no	no
Bp7028_FL-5-2-10-S1-D0_vietnamiensis	SRR1956462	no	yes	no	no
Bp7029_FL-5-2-10-S2-D0_vietnamiensis	SRR1956372	no	yes	no	no
Bp7030_FL-5-3-30-S1-D7_cenocepacia	SRR1956104	no	yes	no	no
Bp7031_FL-5-4-10-S1-D7_seminalis	SRR1956102	no	yes	no	no
Bp7032_FL-5-5-10-S1-D0_seminalis	SRR1956431	no	yes	no	no
Bp7033_FL-6-2-30-S1-D2_cenocepacia	SRR1956379	no	yes	no	no
Bp7034_FL-6-3-10-S1-D0_cepacia	SRR1956396	no	yes	no	no
Bp7035_FL-6-5-30-S1-D7_metallica	SRR1956426	no	yes	no	no
Bp7036_FL-7-1-10-S1-D0_vietnamiensis	SRR1956373	no	yes	no	no
Bp7037_FL-7-2-10-S1-D7_PS4	SRR1956420	no	yes	no	no
Bp7038_FL-7-2-10-S2-D0_vietnamiensis	SRR1956374	no	yes	no	no
Bp7039_FL-7-3-30-S2-D0_vietnamiensis	SRR1956375	no	yes	no	no
Bp7040_FL-7-4-10-S1-D0_vietnamiensis	SRR1956376	no	yes	no	no
Bp7041_FL-7-4-30-S2-D0_vietnamiensis	SRR1956377	no	yes	no	no
Bp7042_FL-7-4-30-S3-D0_vietnamiensis	SRR1956463	no	yes	no	no
Bp7043_FL-7-5-30-S1-D0_lata	SRR1956424	no	yes	no	no
Bp7044_FL-7-5-30-S2-D0_vietnamiensis	SRR1956378	no	yes	no	no
Bp7045_E1_thailandensis	SRR1956086	no	yes	no	no
Bp7046_Malaysia-20_thailandensis	SRR1956087	no	yes	no	no
Bp7047_MSMB59_thailandensis	SRR1956088	no	yes	no	no
Bp7048_MSMB60_thailandensis	SRR1956089	no	yes	no	no
Bp7049_MSMB122_humptydooensis	SRR1956040	no	yes	no	no
Bp7050_MSMB112_ubonensis	SRR1956091	no	yes	no	no
Bp7052_2002721121_thailandensis	SRR2972861	no	yes	no	no
Bp7053_2002721621_thailandensis	SRR2972893	no	yes	no	no
Bp7055_2002721643_thailandensis	SRR2972898	no	yes	no	no
Bp7060_MSMB0010_diffusa	SRR1956344	no	yes	no	no
Bp7061_MSMB0011_ubonensis	SRR1956345	no	yes	no	no
Bp7062_MSMB2035_ubonensis	SRR1956346	no	yes	no	no
Bp7063_MSMB0265_PS3	SRR1956347	no	yes	no	no
Bp7064_MSMB0266_PS3	SRR1956348	no	yes	no	no
Bp7065_MSMB2036_ubonensis	SRR1956349	no	yes	no	no
Bp7066_MSMB0589_territorii	SRR1956498	no	yes	no	no
Bp7069_MSMB0607_pseudomultivorans	SRR1956499	no	yes	no	no
Bp7070_MSMB2037_ubonensis	SRR1956350	no	yes	no	no
Bp7071_MSMB0783_ubonensis	SRR1956480	no	yes	no	no
Bp7072_MSMB2040_PS3	SRR1956351	no	yes	no	no
Bp7073_MSMB0827_ubonensis	SRR1956481	no	yes	no	no
Bp7074_MSMB2041_PS3	SRR1956352	no	yes	no	no
Bp7075_MSMB2042_PS3	SRR1956500	no	yes	no	no
Bp7076_MSMB0848_anthina	SRR1956501	no	yes	no	no
Bp7077_MSMB0849_anthina	SRR1956502	no	yes	no	no
Bp7078_MSMB2043_ubonensis	SRR1956482	no	yes	no	no
Bp7079_MSMB0852_PS3	SRR1956503	no	yes	no	no
Bp7080_MSMB0856_PS4	SRR1956504	no	yes	no	no
Bp7081_MSMB0859_cepacia	SRR1956505	no	yes	no	no
Bp7082_MSMB2044_ubonensis	SRR1956483	no	yes	no	no
Bp7083_MSMB1060_diffusa	SRR1956421	no	yes	no	no
Bp7084_MSMB1072_PS5	SRR1956404	no	yes	no	no
Bp7086_MSMB1129_cepacia	SRR1956397	no	yes	no	no
Bp7088_MSMB1172_ubonensis	SRR1956452	no	yes	no	no
Bp7089_MSMB1224_cepacia	SRR1956398	no	yes	no	no
Bp7090_MSMB2045_ubonensis	SRR1956484	no	yes	no	no
Bp7091_MSMB1302_cepacia	SRR1956405	no	yes	no	no
Bp7092_MSMB2046_ubonensis	SRR1956485	no	yes	no	no
Bp7093_MSMB1498_PS3	SRR1956427	no	yes	no	no
Bp7097_MSMB1588_humptydooensis	SRR1956506	no	yes	no	no
Bp7098_MSMB1820_cepacia	SRR1956406	no	yes	no	no
Bp7099_MSMB1821_territorii	SRR1956407	no	yes	no	no
Bp7100_MSMB1823_ubonensis	SRR1956453	no	yes	no	no
Bp7101_MSMB1826_PS5	SRR1956353	no	yes	no	no
Bp7102_MSMB1830_cepacia	SRR1956399	no	yes	no	no
Bp7103_MSMB1835_PS5	SRR1956408	no	yes	no	no
Bp7104_MSMB1836_territorii	SRR1956507	no	yes	no	no
Bp7105_MSMB1837_territorii	SRR1956508	no	yes	no	no
Bp7106_MSMB1838_territorii	SRR1956509	no	yes	no	no
Bp7107_MSMB1842_territorii	SRR1956510	no	yes	no	no
Bp7108_MSMB1906_cepacia	SRR1956511	no	yes	no	no
Bp7114_MSMB2047_ubonensis	SRR1956486	no	yes	no	no
Bp7115_MSMB2048_ubonensis	SRR1956487	no	yes	no	no
Bp7116_MSMB2049_ubonensis	SRR1956488	no	yes	no	no
Bp7117_MSMB2050_ubonensis	SRR1956489	no	yes	no	no
Bp7118_MSMB2051_stagnalis	SRR1956512	no	yes	no	no
Bp7119_MSMB2052_stagnalis	SRR1956513	no	yes	no	no
Bp7120_MSMB2053_stagnalis	SRR1956514	no	yes	no	no
Bp7121_MSMB2054_ubonensis	SRR1956490	no	yes	no	no
Bp7122_MSMB2055_ubonensis	SRR1956491	no	yes	no	no
Bp7125_MSMB2058_ubonensis	SRR1956492	no	yes	no	no
Bp7126_MSMB2059_ubonensis	SRR1956493	no	yes	no	no
Bp7127_MSMB2060_ubonensis	SRR1956494	no	yes	no	no
Bp7128_MSMB2061_ubonensis	SRR1956495	no	yes	no	no
Bp7132_BAA-248_vietnamiensis	SRR1956354	no	yes	no	no
Bp7133_MSMB1754_ubonensis	SRR1956454	no	yes	no	no
Bp7134_MSMB1756_gladioli	SRR1956423	no	yes	no	no
Bp7135_MSMB1757_ubonensis	SRR1956455	no	yes	no	no
Bp7136_MSMB1758_ubonensis	SRR1956456	no	yes	no	no
Bp7137_MSMB1147_stagnalis	SRR1956409	no	yes	no	no
Bp7138_MSMB1497_anthina	SRR1956410	no	yes	no	no
Bp7139_MSMB1543_stagnalis	SRR1956411	no	yes	no	no
Bp7140_MSMB1544_diffusa	SRR1956422	no	yes	no	no
Bp7141_MSMB1552_humptydooensis	SRR1956515	no	yes	no	no
Bp7142_MSMB1966_stagnalis	SRR1956412	no	yes	no	no
Bp7143_MSMB1135_stagnalis	SRR1956413	no	yes	no	no
Bp7144_MSMB1755_pyrrocinia	SRR1956430	no	yes	no	no
Bp7145_MSMB1967_stagnalis	SRR1956516	no	yes	no	no
Bp7146_MSMB1969_ubonensis	SRR1956457	no	yes	no	no
Bp7147_MSMB1499_territorii	SRR1956414	no	yes	no	no
Bp7148_MSMB1496_anthina	SRR1956517	no	yes	no	no
Bp7260_MSMB1968_stagnalis	SRR1956434	no	yes	no	no
Bp7262_MSMB1565WGS_ubonensis	SRR1955973	no	yes	no	no
Bp7264_MSMB1568WGS_ubonensis	SRR1955974	no	yes	no	no
Bp7266_MSMB1570WGS_stagnalis	SRR1955975	no	yes	no	no
Bp7268_MSMB1585WGS_ubonensis	SRR1955976	no	yes	no	no
Bp7269_MSMB1586WGS_ubonensis	SRR1955977	no	yes	no	no
Bp7270_MSMB1589WGS_humptydooensis	SRR1955978	no	yes	no	no
Bp7271_MSMB1591WGS_ubonensis	SRR1955979	no	yes	no	no
Bp7272_MSMB1592WGS_ubonensis	SRR1955980	no	yes	no	no
Bp7273_MSMB1596WGS_ubonensis	SRR1955981	no	yes	no	no
Bp7274_MSMB1598WGS_ubonensis	SRR1955982	no	yes	no	no
Bp7275_MSMB1599WGS_ubonensis	SRR1955983	no	yes	no	no
Bp7276_MSMB1600WGS_ubonensis	SRR1955984	no	yes	no	no
Bp7277_MSMB1601WGS_ubonensis	SRR1955985	no	yes	no	no
Bp7278_MSMB1602WGS_stagnalis	SRR1955986	no	yes	no	no
Bp7279_MSMB1603WGS_ubonensis	SRR1955987	no	yes	no	no
Bp7280_MSMB1604WGS_stagnalis	SRR1955988	no	yes	no	no
Bp7281_MSMB1605WGS_ubonensis	SRR1955989	no	yes	no	no
Bp7282_MSMB1606WGS_stagnalis	SRR1955990	no	yes	no	no
Bp7283_MSMB1607WGS_ubonensis	SRR1955991	no	yes	no	no
Bp7284_MSMB1623WGS_ubonensis	SRR1955992	no	yes	no	no
Bp7285_MSMB1627WGS_ubonensis	SRR1955993	no	yes	no	no
Bp7286_MSMB1633WGS_ubonensis	SRR1955994	no	yes	no	no
Bp7287_MSMB1637WGS_ubonensis	SRR1955995	no	yes	no	no
Bp7288_MSMB1638WGS_stagnalis	SRR1955996	no	yes	no	no
Bp7289_MSMB1639WGS_ubonensis	SRR1955997	no	yes	no	no
Bp7291_MSMB1791WGS_ubonensis	SRR1955998	no	yes	no	no
Bp7292_MSMB1794WGS_multivorans	SRR1955999	no	yes	no	no
Bp7293_MSMB1795WGS_ubonensis	SRR1956000	no	yes	no	no
Bp7294_MSMB1797WGS_ubonensis	SRR1956001	no	yes	no	no
Bp7295_MSMB1800WGS_ubonensis	SRR1956002	no	yes	no	no
Bp7296_MSMB1801WGS_ubonensis	SRR1956003	no	yes	no	no
Bp7297_MSMB1802WGS_ubonensis	SRR1956004	no	yes	no	no
Bp7298_MSMB1803WGS_ubonensis	SRR1956005	no	yes	no	no
Bp7299_MSMB1804WGS_ubonensis	SRR1956006	no	yes	no	no
Bp7300_MSMB1806WGS_ubonensis	SRR1956007	no	yes	no	no
Bp7301_MSMB1807WGS_ubonensis	SRR1956008	no	yes	no	no
Bp7302_MSMB1808WGS_ubonensis	SRR1956009	no	yes	no	no
Bp7303_MSMB1810WGS_ubonensis	SRR1956010	no	yes	no	no
Bp7304_MSMB1811WGS_ubonensis	SRR1956011	no	yes	no	no
Bp7305_MSMB1812WGS_ubonensis	SRR1956012	no	yes	no	no
Bp7306_MSMB1817WGS_ubonensis	SRR1956013	no	yes	no	no
Bp7307_MSMB1824WGS_cepacia	SRR1956014	no	yes	no	no
Bp7308_MSMB1829WGS_cepacia	SRR1956015	no	yes	no	no
Bp7309_MSMB1831WGS_cepacia	SRR1956016	no	yes	no	no
Bp7310_MSMB1832WGS_ubonensis	SRR1956017	no	yes	no	no
Bp7311_MSMB1839WGS_territorii	SRR1956018	no	yes	no	no
Bp7315_MSMB1914WGS_territorii	SRR1956019	no	yes	no	no
Bp7316_MSMB1919WGS_territorii	SRR1956020	no	yes	no	no
Bp7327_MSMB2006WGS_ubonensis	SRR1956021	no	yes	no	no
Bp7328_MSMB2007WGS_ubonensis	SRR1956022	no	yes	no	no
Bp7329_MSMB2008WGS_multivorans	SRR1956023	no	yes	no	no
Bp7330_MSMB2009WGS_ubonensis	SRR1956024	no	yes	no	no
Bp7331_MSMB2010WGS_ubonensis	SRR1956025	no	yes	no	no
Bp7332_MSMB2011WGS_ubonensis	SRR1956026	no	yes	no	no
Bp7333_MSMB2012WGS_ubonensis	SRR1956027	no	yes	no	no
Bp7334_MSMB2013WGS_ubonensis	SRR1956028	no	yes	no	no
Bp7335_MSMB2014WGS_ubonensis	SRR1956029	no	yes	no	no
Bp7336_MSMB2016WGS_ubonensis	SRR1956030	no	yes	no	no
Bp7337_MSMB2018WGS_ubonensis	SRR1956031	no	yes	no	no
Bp7338_MSMB2020WGS_ubonensis	SRR1956032	no	yes	no	no
Bp7339_MSMB2021WGS_multivorans	SRR1956033	no	yes	no	no
Bp7340_MSMB2022WGS_ubonensis	SRR1956034	no	yes	no	no
Bp7341_MSMB2024WGS_ubonensis	SRR1956035	no	yes	no	no
Bp7342_MSMB2026WGS_ubonensis	SRR1956036	no	yes	no	no
Bp7343_MSMB2027WGS_cepacia	SRR1956037	no	yes	no	no
Bp7344_AU1185_multivorans	SRR1956464	no	yes	no	no
Bp7345_AU1233_vietnamiensis	SRR1956465	no	yes	no	no
Bp7346_AU15829_vietnamiensis	SRR1956038	no	yes	no	no
Bp7347_AU17928_latens	SRR1956466	no	yes	no	no
Bp7348_AU21726_vietnamiensis	SRR1956467	no	yes	no	no
Bp7349_AU25004_vietnamiensis	SRR1956468	no	yes	no	no
Bp7350_AU25340_vietnamiensis	SRR1956469	no	yes	no	no
Bp7351_AU26564_vietnamiensis	SRR1956470	no	yes	no	no
Bp7352_HI2221_vietnamiensis	SRR1956471	no	yes	no	no
Bp7353_HI2297_vietnamiensis	SRR1956039	no	yes	no	no
Bp7354_HI3392_vietnamiensis	SRR1956472	no	yes	no	no
Bp7355_HI3534_multivorans	SRR1956473	no	yes	no	no
Bp7356_HI3908_vietnamiensis	SRR1956474	no	yes	no	no
Bp7357_PC082_vietnamiensis	SRR1956475	no	yes	no	no
Bp7398_MSMB1055WGS_cepacia	SRR1956105	no	yes	no	no
Bp7399_MSMB1058WGS_ubonensis	SRR1956106	no	yes	no	no
Bp7400_MSMB1059WGS_ubonensis	SRR1956107	no	yes	no	no
Bp7401_MSMB1061WGS_cepacia	SRR1956108	no	yes	no	no
Bp7402_MSMB1062WGS_cepacia	SRR1956109	no	yes	no	no
Bp7403_MSMB1063WGS_cepacia	SRR1956110	no	yes	no	no
Bp7404_MSMB1064WGS_ubonensis	SRR1956111	no	yes	no	no
Bp7405_MSMB1065WGS_ubonensis	SRR1956112	no	yes	no	no
Bp7406_MSMB1066WGS_ubonensis	SRR1956113	no	yes	no	no
Bp7407_MSMB1067WGS_ubonensis	SRR1956114	no	yes	no	no
Bp7409_MSMB1069WGS_ubonensis	SRR1956115	no	yes	no	no
Bp7410_MSMB1070WGS_ubonensis	SRR1956116	no	yes	no	no
Bp7411_MSMB1078WGS_PS5	SRR1956117	no	yes	no	no
Bp7412_MSMB1079WGS_ubonensis	SRR1956118	no	yes	no	no
Bp7413_MSMB1080WGS_ubonensis	SRR1956119	no	yes	no	no
Bp7414_MSMB1081WGS_ubonensis	SRR1956120	no	yes	no	no
Bp7415_MSMB1082WGS_ubonensis	SRR1956121	no	yes	no	no
Bp7416_MSMB1128WGS_multivorans	SRR1956122	no	yes	no	no
Bp7417_MSMB1137WGS_ubonensis	SRR1956123	no	yes	no	no
Bp7418_MSMB1139WGS_ubonensis	SRR1956124	no	yes	no	no
Bp7419_MSMB1140WGS_ubonensis	SRR1956125	no	yes	no	no
Bp7420_MSMB1145WGS_ubonensis	SRR1956126	no	yes	no	no
Bp7422_MSMB1157WGS_ubonensis	SRR1956127	no	yes	no	no
Bp7423_MSMB1162WGS_ubonensis	SRR1956128	no	yes	no	no
Bp7424_MSMB1168WGS_territorii	SRR1956129	no	yes	no	no
Bp7425_MSMB1171WGS_ubonensis	SRR1956130	no	yes	no	no
Bp7426_MSMB1173WGS_ubonensis	SRR1956131	no	yes	no	no
Bp7427_MSMB1174WGS_ubonensis	SRR1956132	no	yes	no	no
Bp7428_MSMB1176WGS_ubonensis	SRR1956133	no	yes	no	no
Bp7429_MSMB1178WGS_ubonensis	SRR1956134	no	yes	no	no
Bp7430_MSMB1181WGS_ubonensis	SRR1956135	no	yes	no	no
Bp7431_MSMB1183WGS_ubonensis	SRR1956136	no	yes	no	no
Bp7432_MSMB1184WGS_cepacia	SRR1956137	no	yes	no	no
Bp7433_MSMB1188WGS_ubonensis	SRR1956138	no	yes	no	no
Bp7434_MSMB1189WGS_ubonensis	SRR1956139	no	yes	no	no
Bp7435_MSMB1206WGS_ubonensis	SRR1956140	no	yes	no	no
Bp7436_MSMB1212WGS_ubonensis	SRR1956141	no	yes	no	no
Bp7437_MSMB1213WGS_cepacia	SRR1956142	no	yes	no	no
Bp7438_MSMB1215WGS_ubonensis	SRR1956143	no	yes	no	no
Bp7439_MSMB1216WGS_ubonensis	SRR1956144	no	yes	no	no
Bp7440_MSMB1218WGS_ubonensis	SRR1956145	no	yes	no	no
Bp7441_MSMB1219WGS_ubonensis	SRR1956146	no	yes	no	no
Bp7442_MSMB1220WGS_ubonensis	SRR1956147	no	yes	no	no
Bp7443_MSMB1221WGS_ubonensis	SRR1956148	no	yes	no	no
Bp7444_MSMB1225WGS_ubonensis	SRR1956149	no	yes	no	no
Bp7445_MSMB1256WGS_cepacia	SRR1956150	no	yes	no	no
Bp7446_MSMB1264WGS_ubonensis	SRR1956151	no	yes	no	no
Bp7447_MSMB1272WGS_multivorans	SRR1956152	no	yes	no	no
Bp7448_MSMB1273WGS_ubonensis	SRR1956153	no	yes	no	no
Bp7449_MSMB1301WGS_territorii	SRR1956047	no	yes	no	no
Bp7450_MSMB1304WGS_ubonensis	SRR1956048	no	yes	no	no
Bp7451_MSMB1329WGS_cepacia	SRR1956049	no	yes	no	no
Bp7452_MSMB1330WGS_cepacia	SRR1956050	no	yes	no	no
Bp7453_MSMB1331WGS_cepacia	SRR1956051	no	yes	no	no
Bp7454_MSMB1332WGS_cepacia	SRR1956052	no	yes	no	no
Bp7455_MSMB1333WGS_cepacia	SRR1956053	no	yes	no	no
Bp7456_MSMB1334WGS_cepacia	SRR1956054	no	yes	no	no
Bp7457_MSMB1337WGS_cepacia	SRR1956055	no	yes	no	no
Bp7458_MSMB1338WGS_cepacia	SRR1956056	no	yes	no	no
Bp7459_MSMB1339WGS_cepacia	SRR1956057	no	yes	no	no
Bp7460_MSMB1342WGS_ubonensis	SRR1956058	no	yes	no	no
Bp7461_MSMB1343WGS_ubonensis	SRR1956059	no	yes	no	no
Bp7462_MSMB1345WGS_ubonensis	SRR1956060	no	yes	no	no
Bp7463_MSMB1346WGS_ubonensis	SRR1956061	no	yes	no	no
Bp7464_MSMB1383WGS_cepacia	SRR1956062	no	yes	no	no
Bp7465_MSMB1384WGS_cepacia	SRR1956063	no	yes	no	no
Bp7466_MSMB1470WGS_stagnalis	SRR1956064	no	yes	no	no
Bp7467_MSMB1472WGS_ubonensis	SRR1956065	no	yes	no	no
Bp7468_MSMB1473WGS_ubonensis	SRR1956066	no	yes	no	no
Bp7469_MSMB1477WGS_stagnalis	SRR1956067	no	yes	no	no
Bp7470_MSMB1486WGS_cepacia	SRR1956068	no	yes	no	no
Bp7471_MSMB1487WGS_stagnalis	SRR1956069	no	yes	no	no
Bp7472_MSMB1488WGS_ubonensis	SRR1956070	no	yes	no	no
Bp7473_MSMB1489WGS_ubonensis	SRR1956071	no	yes	no	no
Bp7474_MSMB1490WGS_ubonensis	SRR1956072	no	yes	no	no
Bp7476_MSMB1502WGS_territorii	SRR1956073	no	yes	no	no
Bp7479_MSMB1506WGS_anthina	SRR1956074	no	yes	no	no
Bp7480_MSMB1507WGS_ubonensis	SRR1956075	no	yes	no	no
Bp7481_MSMB1508WGS_ubonensis	SRR1956076	no	yes	no	no
Bp7482_MSMB1510WGS_cepacia	SRR1956077	no	yes	no	no
Bp7483_MSMB1512WGS_stagnalis	SRR1956078	no	yes	no	no
Bp7484_MSMB1513WGS_cepacia	SRR1956079	no	yes	no	no
Bp7485_MSMB1514WGS_stagnalis	SRR1956080	no	yes	no	no
Bp7486_MSMB1516WGS_ubonensis	SRR1956081	no	yes	no	no
Bp7487_MSMB1517WGS_ubonensis	SRR1956082	no	yes	no	no
Bp7488_MSMB1518WGS_ubonensis	SRR1956083	no	yes	no	no
Bp7489_MSMB1519WGS_ubonensis	SRR1956084	no	yes	no	no
Bp7490_MSMB1520WGS_ubonensis	SRR1956085	no	yes	no	no
Bp7491_MSMB1521WGS_stagnalis	SRR1956154	no	yes	no	no
Bp7494_MSMB1530WGS_ubonensis	SRR1956155	no	yes	no	no
Bp7496_MSMB1533WGS_cepacia	SRR1956156	no	yes	no	no
Bp7497_MSMB1535WGS_multivorans	SRR1956157	no	yes	no	no
Bp7500_MSMB1559WGS_ubonensis	SRR1956158	no	yes	no	no
Bp7501_MSMB1561WGS_ubonensis	SRR1956159	no	yes	no	no
Bp7502_MSMB1562WGS_ubonensis	SRR1956160	no	yes	no	no
Bp7503_MSMB1608WGS_ubonensis	SRR1956161	no	yes	no	no
Bp7504_MSMB1628WGS_ubonensis	SRR1956162	no	yes	no	no
Bp7505_MSMB1629WGS_ubonensis	SRR1956163	no	yes	no	no
Bp7506_MSMB1636WGS_ubonensis	SRR1956164	no	yes	no	no
Bp7507_MSMB1641WGS_multivorans	SRR1956165	no	yes	no	no
Bp7509_MSMB1805WGS_ubonensis	SRR1956166	no	yes	no	no
Bp7510_MSMB1809WGS_ubonensis	SRR1956167	no	yes	no	no
Bp7511_MSMB1819WGS_cepacia	SRR1956168	no	yes	no	no
Bp7512_MSMB1840WGS_territorii	SRR1956169	no	yes	no	no
Bp7513_MSMB1843WGS_territorii	SRR1956170	no	yes	no	no
Bp7514_MSMB1913WGS_territorii	SRR1956171	no	yes	no	no
Bp7515_MSMB1915WGS_territorii	SRR1956172	no	yes	no	no
Bp7516_MSMB1916WGS_multivorans	SRR1956173	no	yes	no	no
Bp7517_MSMB1917WGS_territorii	SRR1956174	no	yes	no	no
Bp7518_MSMB1918WGS_territorii	SRR1956175	no	yes	no	no
Bp7519_MSMB1943WGS_stagnalis	SRR1956176	no	yes	no	no
Bp7520_MSMB1956WGS_stagnalis	SRR1956177	no	yes	no	no
Bp7521_MSMB1960WGS_stagnalis	SRR1956178	no	yes	no	no
Bp7522_MSMB2085WGS_ubonensis	SRR1956179	no	yes	no	no
Bp7523_MSMB2087WGS_ubonensis	SRR1956180	no	yes	no	no
Bp7524_MSMB2092WGS_ubonensis	SRR1956181	no	yes	no	no
Bp7525_MSMB2093WGS_ubonensis	SRR1956182	no	yes	no	no
Bp7526_MSMB2095WGS_cepacia	SRR1956183	no	yes	no	no
Bp7527_MSMB2098WGS_ubonensis	SRR1956184	no	yes	no	no
Bp7528_MSMB2099WGS_cepacia	SRR1956185	no	yes	no	no
Bp7529_MSMB2104WGS_ubonensis	SRR1956186	no	yes	no	no
Bp7530_MSMB2105WGS_ubonensis	SRR1956187	no	yes	no	no
Bp7531_MSMB2106WGS_ubonensis	SRR1956188	no	yes	no	no
Bp7532_MSMB2107WGS_ubonensis	SRR1956189	no	yes	no	no
Bp7533_MSMB2108WGS_ubonensis	SRR1956190	no	yes	no	no
Bp7534_MSMB2109WGS_ubonensis	SRR1956191	no	yes	no	no
Bp7535_MSMB2110WGS_ubonensis	SRR1956192	no	yes	no	no
Bp7536_MSMB2111WGS_ubonensis	SRR1956193	no	yes	no	no
Bp7537_MSMB2112WGS_ubonensis	SRR1956194	no	yes	no	no
Bp7538_MSMB2114WGS_ubonensis	SRR1956195	no	yes	no	no
Bp7539_MSMB2115WGS_ubonensis	SRR1956196	no	yes	no	no
Bp7540_MSMB2116WGS_ubonensis	SRR1956197	no	yes	no	no
Bp7541_MSMB2118WGS_ubonensis	SRR1956198	no	yes	no	no
Bp7542_MSMB2119WGS_ubonensis	SRR1956199	no	yes	no	no
Bp7543_MSMB2120WGS_ubonensis	SRR1956200	no	yes	no	no
Bp7544_MSMB2121WGS_ubonensis	SRR1956201	no	yes	no	no
Bp7545_MSMB2122WGS_ubonensis	SRR1956202	no	yes	no	no
Bp7546_MSMB2123WGS_ubonensis	SRR1956203	no	yes	no	no
Bp7547_MSMB2124WGS_ubonensis	SRR1956204	no	yes	no	no
Bp7548_MSMB2125WGS_ubonensis	SRR1956205	no	yes	no	no
Bp7550_MSMB1224WGS_cepacia	SRR1956206	no	yes	no	no
Bp7551_MSMB1228WGS_cepacia	SRR1956207	no	yes	no	no
Bp7552_MSMB2210WGS_cepacia	SRR1956208	no	yes	no	no
Bp7553_MSMB2211WGS_cepacia	SRR1956209	no	yes	no	no
Bp7554_MSMB2168WGS_stagnalis	SRR1956210	no	yes	no	no
Bp7555_MSMB2169WGS_stagnalis	SRR1956211	no	yes	no	no
Bp7556_MSMB2187WGS_ubonensis	SRR1956212	no	yes	no	no
Bp7557_MSMB2188WGS_ubonensis	SRR1956213	no	yes	no	no
Bp7558_MSMB2189WGS_ubonensis	SRR1956214	no	yes	no	no
Bp7559_MSMB2190WGS_ubonensis	SRR1956215	no	yes	no	no
Bp7560_MSMB2191WGS_ubonensis	SRR1956216	no	yes	no	no
Bp7561_MSMB2192WGS_ubonensis	SRR1956217	no	yes	no	no
Bp7562_MSMB2193WGS_ubonensis	SRR1956218	no	yes	no	no
Bp7563_MSMB2163WGS_ubonensis	SRR1956219	no	yes	no	no
Bp7564_MSMB2162WGS_ubonensis	SRR1956220	no	yes	no	no
Bp7565_MSMB2164WGS_cepacia	SRR1956221	no	yes	no	no
Bp7566_MSMB2165WGS_cepacia	SRR1956222	no	yes	no	no
Bp7567_MSMB2185WGS_ubonensis	SRR1956223	no	yes	no	no
Bp7568_MSMB2186WGS_ubonensis	SRR1956224	no	yes	no	no
Bp7569_MSMB2166WGS_ubonensis	SRR1956225	no	yes	no	no
Bp7570_MSMB2167WGS_ubonensis	SRR1956226	no	yes	no	no
Bp7571_MSMB2170WGS_stagnalis	SRR1956227	no	yes	no	no
Bp7572_MSMB2171WGS_stagnalis	SRR1956228	no	yes	no	no
Bp7576_MSMB2177WGS_cepacia	SRR1956229	no	yes	no	no
Bp7577_MSMB2159WGS_ubonensis	SRR1956230	no	yes	no	no
Bp7578_MSMB2156WGS_territorii	SRR1956231	no	yes	no	no
Bp7580_MSMB2202WGS_territorii	SRR1956232	no	yes	no	no
Bp7581_MSMB2206WGS_territorii	SRR1956233	no	yes	no	no
Bp7582_MSMB2207WGS_ubonensis	SRR1956234	no	yes	no	no
Bp7583_MSMB2203WGS_territorii	SRR1956235	no	yes	no	no
Bp7584_MSMB2157WGS_PS5	SRR1956236	no	yes	no	no
Bp7585_MSMB2180WGS_ubonensis	SRR1956237	no	yes	no	no
Bp7586_MSMB2179WGS_ubonensis	SRR1956238	no	yes	no	no
Bp7587_MSMB2181WGS_ubonensis	SRR1956239	no	yes	no	no
Bp7588_MSMB2204WGS_territorii	SRR1956240	no	yes	no	no
Bp7589_MSMB2205WGS_ubonensis	SRR1956241	no	yes	no	no
Bp7591_MSMB2151WGS_ubonensis	SRR1956242	no	yes	no	no
Bp7592_MSMB2152WGS_ubonensis	SRR1956243	no	yes	no	no
Bp7595_MSMB2199WGS_pseudomultivorans	SRR1956244	no	yes	no	no
Bp7605_MSMB0715_PS1	CP013448, CP013449	no	yes	no	no
Bp7613_MSMB19WGS_ubonensis	SRR1956245	no	yes	no	no
Bp7614_MSMB364WGS_cenocepacia	SRR1956246	no	yes	no	no
Bp7615_MSMB368WGS_pseudomultivorans	SRR1956247	no	yes	no	no
Bp7616_MSMB375WGS_diffusa	SRR1956248	no	yes	no	no
Bp7617_MSMB376WGS_diffusa	SRR1956249	no	yes	no	no
Bp7618_MSMB377WGS_diffusa	SRR1956250	no	yes	no	no
Bp7619_MSMB378WGS_diffusa	SRR1956251	no	yes	no	no
Bp7620_MSMB383WGS_cenocepacia	SRR1956252	no	yes	no	no
Bp7621_MSMB384WGS_cenocepacia	SRR1956253	no	yes	no	no
Bp7622_MSMB574WGS_pseudomultivorans	SRR1956254	no	yes	no	no
Bp7623_MSMB575WGS_multivorans	SRR1956255	no	yes	no	no
Bp7624_MSMB576WGS_multivorans	SRR1956256	no	yes	no	no
Bp7625_MSMB583WGS_diffusa	SRR1956257	no	yes	no	no
Bp7626_MSMB591WGS_cepacia	SRR1956258	no	yes	no	no
Bp7627_MSMB593WGS_cepacia	SRR1956259	no	yes	no	no
Bp7628_MSMB594WGS_territorii	SRR1956260	no	yes	no	no
Bp7629_MSMB599WGS_territorii	SRR1956261	no	yes	no	no
Bp7630_MSMB608WGS_vietnamiensis	SRR1956262	no	yes	no	no
Bp7631_MSMB609WGS_ubonensis	SRR1956263	no	yes	no	no
Bp7632_MSMB612WGS_multivorans	SRR1956264	no	yes	no	no
Bp7633_MSMB616WGS_cepacia	SRR1956265	no	yes	no	no
Bp7634_MSMB617WGS_PS3	SRR1956266	no	yes	no	no
Bp7635_MSMB618WGS_stagnalis	SRR1956267	no	yes	no	no
Bp7636_MSMB642WGS_stagnalis	SRR1956268	no	yes	no	no
Bp7637_MSMB648WGS_cepacia	SRR1956269	no	yes	no	no
Bp7638_MSMB649WGS_anthina	SRR1956270	no	yes	no	no
Bp7639_MSMB653WGS_stagnalis	SRR1956271	no	yes	no	no
Bp7640_MSMB654WGS_stagnalis	SRR1956272	no	yes	no	no
Bp7641_MSMB656WGS_stagnalis	SRR1956273	no	yes	no	no
Bp7642_MSMB657WGS_stagnalis	SRR1956274	no	yes	no	no
Bp7643_MSMB658WGS_stagnalis	SRR1956275	no	yes	no	no
Bp7644_MSMB659WGS_stagnalis	SRR1956276	no	yes	no	no
Bp7645_MSMB660WGS_stagnalis	SRR1956277	no	yes	no	no
Bp7647_MSMB691WGS_ubonensis	SRR1956278	no	yes	no	no
Bp7648_MSMB696WGS_ubonensis	SRR1956279	no	yes	no	no
Bp7649_MSMB702WGS_ubonensis	SRR1956280	no	yes	no	no
Bp7650_MSMB705WGS_ubonensis	SRR1956281	no	yes	no	no
Bp7651_MSMB719WGS_stagnalis	SRR1956282	no	yes	no	no
Bp7652_MSMB720WGS_ubonensis	SRR1956283	no	yes	no	no
Bp7653_MSMB724WGS_cepacia	SRR1956284	no	yes	no	no
Bp7654_MSMB725WGS_pseudomultivorans	SRR1956285	no	yes	no	no
Bp7655_MSMB728WGS_ubonensis	SRR1956286	no	yes	no	no
Bp7656_MSMB729WGS_stagnalis	SRR1956287	no	yes	no	no
Bp7657_MSMB735WGS_stagnalis	SRR1956288	no	yes	no	no
Bp7658_MSMB739WGS_stagnalis	SRR1956289	no	yes	no	no
Bp7659_MSMB742WGS_ubonensis	SRR1956290	no	yes	no	no
Bp7660_MSMB746WGS_ubonensis	SRR1956291	no	yes	no	no
Bp7661_MSMB747WGS_ubonensis	SRR1956292	no	yes	no	no
Bp7662_MSMB748WGS_ubonensis	SRR1956293	no	yes	no	no
Bp7663_MSMB749WGS_stagnalis	SRR1956294	no	yes	no	no
Bp7664_MSMB752WGS_ubonensis	SRR1956295	no	yes	no	no
Bp7665_MSMB754WGS_stagnalis	SRR1956296	no	yes	no	no
Bp7666_MSMB756WGS_stagnalis	SRR1956297	no	yes	no	no
Bp7667_MSMB757WGS_stagnalis	SRR1956298	no	yes	no	no
Bp7668_MSMB761WGS_ubonensis	SRR1956299	no	yes	no	no
Bp7669_MSMB764WGS_ubonensis	SRR1956300	no	yes	no	no
Bp7670_MSMB774WGS_stagnalis	SRR1956301	no	yes	no	no
Bp7671_MSMB777WGS_stagnalis	SRR1956302	no	yes	no	no
Bp7672_MSMB778WGS_ubonensis	SRR1956303	no	yes	no	no
Bp7673_MSMB780WGS_stagnalis	SRR1956304	no	yes	no	no
Bp7674_MSMB782WGS_ubonensis	SRR1956305	no	yes	no	no
Bp7675_MSMB785WGS_ubonensis	SRR1956306	no	yes	no	no
Bp7676_MSMB788WGS_ubonensis	SRR1956307	no	yes	no	no
Bp7677_MSMB791WGS_ubonensis	SRR1956308	no	yes	no	no
Bp7678_MSMB792WGS_ubonensis	SRR1956309	no	yes	no	no
Bp7679_MSMB793WGS_territorii	SRR1956310	no	yes	no	no
Bp7680_MSMB794WGS_ubonensis	SRR1956311	no	yes	no	no
Bp7681_MSMB800WGS_stagnalis	SRR1956312	no	yes	no	no
Bp7682_MSMB802WGS_stagnalis	SRR1956313	no	yes	no	no
Bp7683_MSMB803WGS_ubonensis	SRR1956314	no	yes	no	no
Bp7684_MSMB808WGS_stagnalis	SRR1956315	no	yes	no	no
Bp7685_MSMB809WGS_stagnalis	SRR1956316	no	yes	no	no
Bp7686_MSMB810WGS_stagnalis	SRR1956317	no	yes	no	no
Bp7687_MSMB811WGS_stagnalis	SRR1956318	no	yes	no	no
Bp7688_MSMB818WGS_ubonensis	SRR1956319	no	yes	no	no
Bp7689_MSMB822WGS_ubonensis	SRR1956320	no	yes	no	no
Bp7690_MSMB826WGS_stagnalis	SRR1956321	no	yes	no	no
Bp7691_MSMB834WGS_ubonensis	SRR1956322	no	yes	no	no
Bp7692_MSMB835WGS_stagnalis	SRR1956323	no	yes	no	no
Bp7693_MSMB836WGS_stagnalis	SRR1956324	no	yes	no	no
Bp7694_MSMB837WGS_stagnalis	SRR1956325	no	yes	no	no
Bp7695_MSMB839WGS_cepacia	SRR1956326	no	yes	no	no
Bp7696_MSMB842WGS_ubonensis	SRR1956327	no	yes	no	no
Bp7697_MSMB845WGS_stagnalis	SRR1956328	no	yes	no	no
Bp7698_MSMB846WGS_stagnalis	SRR1956329	no	yes	no	no
Bp7699_MSMB847WGS_stagnalis	SRR1956330	no	yes	no	no
Bp7700_MSMB1459WGS_PS5	SRR1956331	no	yes	no	no
Bp7701_MSMB1466WGS_ubonensis	SRR1956332	no	yes	no	no
Bp7702_MSMB1471WGS_ubonensis	SRR1956333	no	yes	no	no
Bp7703_MSMB1474WGS_territorii	SRR1956334	no	yes	no	no
Bp7704_MSMB1509WGS_ubonensis	SRR1956335	no	yes	no	no
Bp7705_MSMB1511WGS_stagnalis	SRR1956336	no	yes	no	no
Bp7706_MSMB1540WGS_ubonensis	SRR1956337	no	yes	no	no
Bp7707_MSMB1545WGS_stagnalis	SRR1956338	no	yes	no	no
Bp7708_MSMB1635WGS_ubonensis	SRR1956339	no	yes	no	no
Bp7709_MSMB1640WGS_multivorans	SRR1956340	no	yes	no	no
Bp7710_MSMB1941WGS_ubonensis	SRR1956341	no	yes	no	no
Bp7711_MSMB2019WGS_ubonensis	SRR1956342	no	yes	no	no
Bp7712_MSMB2028WGS_ubonensis	SRR1956343	no	yes	no	no
Burkholderia_ambifaria_AMMD	GCA_000203915	no	yes	no	no
Burkholderia_ambifaria_MC40-6	GCA_000019925	no	yes	no	no
Burkholderia_cenocepacia_869T2	GCA_000705535	no	yes	no	no
Burkholderia_cenocepacia_AU_1054	GCA_000014085	no	yes	no	no
Burkholderia_cenocepacia_BC7	GCA_000333135	no	yes	no	no
Burkholderia_cenocepacia_CEIB_S5-1	GCA_000818575	no	yes	no	no
Burkholderia_cenocepacia_D2AES	GCA_000689595	no	yes	no	no
Burkholderia_cenocepacia_DDS_22E-1	GCA_000755725	no	yes	no	no
Burkholderia_cenocepacia_DWS_37E-2	GCA_000764955	no	yes	no	no
Burkholderia_cenocepacia_FDAARGOS_82	GCA_000783555	no	yes	no	no
Burkholderia_cenocepacia_H111	GCA_000236215	no	yes	no	no
Burkholderia_cenocepacia_HI2424	GCA_000203955	no	yes	no	no
Burkholderia_cenocepacia_J2315	GCA_000009485	no	yes	no	no
Burkholderia_cenocepacia_K56-2Valvano	GCA_000333155	no	yes	no	no
Burkholderia_cenocepacia_KC-01	GCA_000498115	no	yes	no	no
Burkholderia_cenocepacia_MC0-3	GCA_000019505	no	yes	no	no
Burkholderia_cenocepacia_S2AES	GCA_000689575	no	yes	no	no
Burkholderia_cepacia_ATCC_25416	GCA_000473485	no	yes	no	no
Burkholderia_cepacia_Bu72	GCA_000504665	no	yes	no	no
Burkholderia_cepacia_DDS_7H-2	GCA_000755805	no	yes	no	no
Burkholderia_cepacia_GG4	GCA_000292915	no	yes	no	no
Burkholderia_cepacia_LK29	GCA_001039005	no	yes	no	no
Burkholderia_cepacia_LMG_16656	GCA_000877315	no	yes	no	no
Burkholderia_cepacia_LO6	GCA_000974835	no	yes	no	no
Burkholderia_cepacia_RB-39	GCA_000724975	no	yes	no	no
Burkholderia_contaminans_FFH2055	GCA_000987055	no	yes	no	no
Burkholderia_contaminans_LMG_23361	GCA_000987075	no	yes	no	no
Burkholderia_contaminans_MS14	GCA_001029145	no	yes	no	no
Burkholderia_dolosa_AU0158	GCA_000959505	no	yes	no	no
Burkholderia_dolosa_PC543	GCA_000497165	no	yes	no	no
Burkholderia_gladioli_BSR3	GCA_000194745	no	yes	no	no
Burkholderia_gladioli_NBRC_13700	GCA_000739755	no	yes	no	no
Burkholderia_gladioli_NGJ1	GCA_001028765	no	yes	no	no
Burkholderia_gladioli_SN82F6	GCA_000981885	no	yes	no	no
Burkholderia_glumae_BGR1	GCA_000022645	no	yes	no	no
Burkholderia_glumae_LMG_2196-ATCC_33617	GCA_000960995	no	yes	no	no
Burkholderia_glumae_PG1	GCA_000835205	no	yes	no	no
Burkholderia_lata_383	GCA_000012945	no	yes	no	no
Burkholderia_lata_LK13	GCA_001038835	no	yes	no	no
Burkholderia_lata_LK27	GCA_001038745	no	yes	no	no
Burkholderia_cenocepacia_33_BMUL	GCA_001056375	no	yes	no	no
Burkholderia_cenocepacia_35_BMUL	GCA_001072455	no	yes	no	no
Burkholderia_cenocepacia_415_BMUL	GCA_001056655	no	yes	no	no
Burkholderia_cenocepacia_423_BMUL	GCA_001056705	no	yes	no	no
Burkholderia_cenocepacia_547_BMUL	GCA_001055325	no	yes	no	no
Burkholderia_cenocepacia_548_BMUL	GCA_001057175	no	yes	no	no
Burkholderia_multivorans_ATCC_17616	GCA_000010545	no	yes	no	no
Burkholderia_multivorans_ATCC_BAA-247	GCA_000959525	no	yes	no	no
Burkholderia_multivorans_CF2	GCA_000286575	no	yes	no	no
Burkholderia_multivorans_CGD1	GCA_000182255	no	yes	no	no
Burkholderia_multivorans_CGD2M	GCA_000182295	no	yes	no	no
Burkholderia_multivorans_D2095	GCA_000807825	no	yes	no	no
Burkholderia_multivorans_D2214	GCA_000807815	no	yes	no	no
Burkholderia_oklahomensis_C6786	GCA_000959365	no	yes	no	no
Burkholderia_oklahomensis_EO147	GCA_001522105	no	yes	no	no
Burkholderia_pseudomallei_ABCPW_111	GCA_000773065	no	yes	no	no
Burkholderia_pyrrocinia_CH-67	GCA_000297475	no	yes	no	no
Burkholderia_pyrrocinia_DSM_10685	GCA_001028665	no	yes	no	no
Burkholderia_pyrrocinia_Lyc2	GCA_000743695	no	yes	no	no
Burkholderia_spp_2002721687	GCA_000959325	no	yes	no	no
Burkholderia_spp_A1	GCA_000633145	no	yes	no	no
Burkholderia_spp_A9	GCA_000801975	no	yes	no	no
Burkholderia_spp_KJ006	GCA_000262695	no	yes	no	no
Burkholderia_spp_lig30	GCA_00068745	no	yes	no	no
Burkholderia_spp_LK4	GCA_001043615	no	yes	no	no
Burkholderia_paludis_MSh1	GCA_000732615	no	yes	no	no
Burkholderia_spp_MSh2	GCA_000731655	no	yes	no	no
Burkholderia_spp_MSHR3999	GCA_000833595	no	yes	no	no
Burkholderia_spp_USM-B20	GCA_000949135	no	yes	no	no
Burkholderia_spp_WP42	GCA_000745665	no	yes	no	no
Burkholderia_thailandensis_2002721643	GCA_000959425	no	yes	no	no
Burkholderia_thailandensis_2002721723	GCA_000567925	no	yes	no	no
Burkholderia_thailandensis_2003015869	GCA_001718295	no	yes	no	no
Burkholderia_thailandensis_34	GCA_000959605	no	yes	no	no
Burkholderia_thailandensis_E254	GCA_000765375	no	yes	no	no
Burkholderia_thailandensis_E264	GCA_000012365	no	yes	no	no
Burkholderia_thailandensis_E444	GCA_000567945	no	yes	no	no
Burkholderia_thailandensis_E555	GCA_000179515	no	yes	no	no
Burkholderia_thailandensis_H0587	GCA_000567905	no	yes	no	no
Burkholderia_thailandensis_MSMB121	GCA_000385525	no	yes	no	no
Burkholderia_thailandensis_MSMB59	GCA_000764595	no	yes	no	no
Burkholderia_thailandensis_USAMRU_Malaysia_20	GCA_000706745	no	yes	no	no
Burkholderia_ubonensis_MSMB22	GCA_000959245	no	yes	no	no
Burkholderia_vietnamiensis_CBMB40	GCA_000980955	no	yes	no	no
Burkholderia_vietnamiensis_G4	GCA_000016205	no	yes	no	no
Burkholderia_vietnamiensis_LMG_10929	GCA_000959445	no	yes	no	no
BURSP-Bp8965-0507P2S1-EN-PRI-2017-064-DW_S1_final_assembly	QTPN00000000	no	yes	no	no
BURSP-Bp8966-0507P2S2-EN-PRI-2017-064-DW_S1_final_assembly	QTPM00000000	no	yes	no	no
BURSP-Bp8968-0908P2S1-EN-PRI-2017-064-DW_S4_final_assembly	QTSQ00000000	no	yes	no	no
BURSP-Bp8969-0909P2S3-EN-PRI-2017-064-DW_S5_final_assembly	QTSP00000000	no	yes	no	no
BURSP-Bp8970-1101P2S3-EN-PRI-2017-064-DW_S6_final_assembly	QTSO00000000	no	yes	no	no
BURSP-Bp8971-1101P2S4-EN-PRI-2017-064-DW_S7_final_assembly	QTPL00000000	no	yes	no	no
BURSP-Bp8972-1102P2S1-EN-PRI-2017-064-DW_S8_final_assembly	QTRO00000000	no	yes	no	no
BURSP-Bp8973-1102P2S2B-EN-PRI-2017-064-DW_S9_final_assembly	QTRN00000000	no	yes	no	no
BURSP-Bp8974-1103P2S1-EN-PRI-2017-064-DW_S10_final_assembly	QTSN00000000	no	yes	no	no
BURSP-Bp8975-1103P2S3-EN-PRI-2017-064-DW_S11_final_assembly	QTPK00000000	no	yes	no	no
BURSP-Bp8976-1103P2S4-EN-PRI-2017-064-DW_S12_final_assembly	QTPJ00000000	no	yes	no	no
BURSP-Bp8977-1105P2S1A-EN-PRI-2017-064-DW_S2_final_assembly	QTQO00000000	no	yes	no	no
BURSP-Bp8978-1105P2S1B-EN-PRI-2017-064-DW_S3_final_assembly	QTSM00000000	no	yes	no	no
BURSP-Bp8979-1105P2S3-EN-PRI-2017-064-DW_S13_final_assembly	QTSL00000000	no	yes	no	no
BURSP-Bp8980-1107P2S1-EN-PRI-2017-064-DW_S4_final_assembly	QTRM00000000	no	yes	no	no
BURSP-Bp8984-1304P2S1-EN-PRI-2017-064-DW_S14_final_assembly	QTQN00000000	no	yes	no	no
BURSP-Bp8985-1304P2S2-EN-PRI-2017-064-DW_S15_final_assembly	QTSK00000000	no	yes	no	no
BURSP-Bp8986-1305P2S1-EN-PRI-2017-064-DW_S16_final_assembly	QTQM00000000	no	yes	no	no
BURSP-Bp8987-1306P2S2-EN-PRI-2017-064-DW_S5_final_assembly	QTPI00000000	no	yes	no	no
BURSP-Bp8988-1401P2S1-EN-PRI-2017-064-DW_S17_final_assembly	QTQR00000000	no	yes	no	no
BURSP-Bp8989-1402P2S1-EN-PRI-2017-064-DW_S18_final_assembly	QTQL00000000	no	yes	no	no
BURSP-Bp8990-1402P2S2-EN-PRI-2017-064-DW_S6_final_assembly	QTQK00000000	no	yes	no	no
BURSP-Bp8991-1404P2S1-EN-PRI-2017-064-DW_S7_final_assembly	QTQJ00000000	no	yes	no	no
BURSP-Bp8992-1404P2S2-EN-PRI-2017-064-DW_S19_final_assembly	QTQI00000000	no	yes	no	no
BURSP-Bp8993-1404P3S1-EN-PRI-2017-064-DW_S20_final_assembly	QTSJ00000000	no	yes	no	no
BURSP-Bp8994-1405P2S1-EN-PRI-2017-064-DW_S8_final_assembly	QTQH00000000	no	yes	no	no
BURSP-Bp8995-1406P2S1-EN-PRI-2017-064-DW_S21_final_assembly	QTQG00000000	no	yes	no	no
BURSP-Bp8997-1507P2S1-EN-PRI-2017-064-DW_S22_final_assembly	QTST00000000	no	yes	no	no
BURSP-Bp8998-1609P2S1-EN-PRI-2017-064-DW_S23_final_assembly	QTQF00000000	no	yes	no	no
BURSP-Bp8999-1808P2S1-EN-PRI-2017-064-DW_S9_final_assembly	QTQZ00000000	no	yes	no	no
BURSP-Bp9000-1808P2S2-EN-PRI-2017-064-DW_S24_final_assembly	QTQY00000000	no	yes	no	no
BURSP-Bp9001-2108P2S1-EN-PRI-2017-064-DW_S25_final_assembly	QTQX00000000	no	yes	no	no
BURSP-Bp9002-2202P2S1-EN-PRI-2017-064-DW_S26_final_assembly	QTQE00000000	no	yes	no	no
BURSP-Bp9003-2308P2S1-EN-PRI-2017-064-DW_S10_final_assembly	QTRL00000000	no	yes	no	no
BURSP-Bp9004-2310P2S1-EN-PRI-2017-064-DW_S11_final_assembly	QTQD00000000	no	yes	no	no
BURSP-Bp9005-2402P2S1-EN-PRI-2017-064-DW_S27_final_assembly	QTSI00000000	no	yes	no	no
BURSP-Bp9006-2404P2S1-EN-PRI-2017-064-DW_S28_final_assembly	QTSH00000000	no	yes	no	no
BURSP-Bp9007-2405P2S1-EN-PRI-2017-064-DW_S29_final_assembly	QTRK00000000	no	yes	no	no
BURSP-Bp9009-5101P2S1-EN-PRI-2017-064-DW_S50_final_assembly	QTSG00000000	no	yes	no	no
BURSP-Bp9010-5110P2S1-EN-PRI-2017-064-DW_S26_final_assembly	QTQC00000000	no	yes	no	no
BURSP-Bp9011-5110P2S2-EN-PRI-2017-064-DW_S27_final_assembly	QTQB00000000	no	yes	no	no
BURSP-Bp9012-5401P2S1-EN-PRI-2017-064-DW_S28_final_assembly	QTQA00000000	no	yes	no	no
BURSP-Bp9013-5404P2S3-EN-PRI-2017-064-DW_S29_final_assembly	QTRJ00000000	no	yes	no	no
BURSP-Bp9015-5408P2S1-EN-PRI-2017-064-DW_S31_final_assembly	QTPZ00000000	no	yes	no	no
BURSP-Bp9016-5502P2S1-EN-PRI-2017-064-DW_S51_final_assembly	QTPY00000000	no	yes	no	no
BURSP-Bp9017-5503P2S1-EN-PRI-2017-064-DW_S52_final_assembly	QTPX00000000	no	yes	no	no
BURSP-Bp9018-5603P2S2-EN-PRI-2017-064-DW_S53_final_assembly	QTQW00000000	no	yes	no	no
BURSP-Bp9019-5701P2S2-EN-PRI-2017-064-DW_S54_final_assembly	QTRI00000000	no	yes	no	no
BURSP-Bp9020-5704P2S1-EN-PRI-2017-064-DW_S32_final_assembly	QTRH00000000	no	yes	no	no
BURSP-Bp9021-5706P2S1-EN-PRI-2017-064-DW_S33_final_assembly	QTSF00000000	no	yes	no	no
BURSP-Bp9022-5708P2S1-EN-PRI-2017-064-DW_S55_final_assembly	QTQQ00000000	no	yes	no	no
BURSP-Bp9023-5709P2S2-EN-PRI-2017-064-DW_S56_final_assembly	QTSE00000000	no	yes	no	no
BURSP-Bp9024-5709P2S3-EN-PRI-2017-064-DW_S34_final_assembly	QTRG00000000	no	yes	no	no
BURSP-Bp9025-5803P2S1-EN-PRI-2017-064-DW_S57_final_assembly	QTQV00000000	no	yes	no	no
BURSP-Bp9029-6001P2S1-EN-PRI-2017-064-DW_S65_final_assembly	QTQU00000000	no	yes	no	no
BURSP-Bp9031-6002P2S3-EN-PRI-2017-064-DW_S36_final_assembly	QTPW00000000	no	yes	no	no
BURSP-Bp9032-6003P2S1-EN-PRI-2017-064-DW_S37_final_assembly	QTRF00000000	no	yes	no	no
BURSP-Bp9033-6004P2S1-EN-PRI-2017-064-DW_S38_final_assembly	QTRE00000000	no	yes	no	no
BURSP-Bp9034-6004P2S2-EN-PRI-2017-064-DW_S39_final_assembly	QTRD00000000	no	yes	no	no
BURSP-Bp9035-6005P2S1-EN-PRI-2017-064-DW_S59_final_assembly	QTRC00000000	no	yes	no	no
BURSP-Bp9036-6006P2S1-EN-PRI-2017-064-DW_S66_final_assembly	QTRB00000000	no	yes	no	no
BURSP-Bp9037-6009P2S1-EN-PRI-2017-064-DW_S60_final_assembly	QTSD00000000	no	yes	no	no
BURSP-Bp9038-6010P2S1-EN-PRI-2017-064-DW_S61_final_assembly	QTSC00000000	no	yes	no	no
BURSP-Bp9087-3601P1S2-EN-PRI-2017-064-DW_S52_final_assembly	QTPH00000000	no	yes	no	no
BURSP-Bp9088-3601P1S3-EN-PRI-2017-064-DW_S53_final_assembly	QTPG00000000	no	yes	no	no
BURSP-Bp9089-3602P1S1-EN-PRI-2017-064-DW_S54_final_assembly	QTPF00000000	no	yes	no	no
BURSP-Bp9090-3604P1S3-EN-PRI-2017-064-DW_S55_final_assembly	QTPV00000000	no	yes	no	no
BURSP-Bp9091-3701P1S2-EN-PRI-2017-064-DW_S57_final_assembly	QTPE00000000	no	yes	no	no
BURSP-Bp9092-3701P1S3-EN-PRI-2017-064-DW_S58_final_assembly	QTPD00000000	no	yes	no	no
BURSP-Bp9093-3701P1S5-EN-PRI-2017-064-DW_S59_final_assembly	QTPC00000000	no	yes	no	no
BURSP-Bp9094-3702P1S1-EN-PRI-2017-064-DW_S60_final_assembly	QTPB00000000	no	yes	no	no
BURSP-Bp9095-3702P1S3-EN-PRI-2017-064-DW_S61_final_assembly	QTPA00000000	no	yes	no	no
BURSP-Bp9096-3702P1S5-EN-PRI-2017-064-DW_S63_final_assembly	QTOZ00000000	no	yes	no	no
BURSP-Bp9097-3703P1S1-EN-PRI-2017-064-DW_S16_final_assembly	QTOY00000000	no	yes	no	no
BURSP-Bp9098-3703P1S2-EN-PRI-2017-064-DW_S40_final_assembly	QTOX00000000	no	yes	no	no
BURSP-Bp9099-3703P1S4-EN-PRI-2017-064-DW_S41_final_assembly	QTPU00000000	no	yes	no	no
BURSP-Bp9100-3704P1S1-EN-PRI-2017-064-DW_S43_final_assembly	QTOW00000000	no	yes	no	no
BURSP-Bp9101-3704P1S2-EN-PRI-2017-064-DW_S17_final_assembly	QTOV00000000	no	yes	no	no
BURSP-Bp9102-3705P1S1-EN-PRI-2017-064-DW_S44_final_assembly	QTOU00000000	no	yes	no	no
BURSP-Bp9103-3705P1S2-EN-PRI-2017-064-DW_S45_final_assembly	QTOT00000000	no	yes	no	no
BURSP-bp9104-3705P1S3-EN-PRI-2017-064-DW_S18_final_assembly	QTOS00000000	no	yes	no	no
BURSP-bp9105-3705P1S5-EN-PRI-2017-064-DW_S46_final_assembly	QTOR00000000	no	yes	no	no
BURSP-Bp9117-2701P2S1-EN-PRI-2017-064-DW_S31_final_assembly	QTSB00000000	no	yes	no	no
BURSP-Bp9118-2704P1S1-EN-PRI-2017-064-DW_S32_final_assembly	QTSA00000000	no	yes	no	no
BURSP-Bp9119-2802P1S1-EN-PRI-2017-064-DW_S34_final_assembly	QTOQ00000000	no	yes	no	no
BURSP-Bp9120-2802P1S2-EN-PRI-2017-064-DW_S35_final_assembly	QTRA00000000	no	yes	no	no
BURSP-Bp9121-2804P1S1-EN-PRI-2017-064-DW_S36_final_assembly	QTOP00000000	no	yes	no	no
BURSP-Bp9122-2804P1S2-EN-PRI-2017-064-DW_S37_final_assembly	QTOO00000000	no	yes	no	no
BURSP-Bp9123-2804P1S3-EN-PRI-2017-064-DW_S38_final_assembly	QTON00000000	no	yes	no	no
BURSP-Bp9124-2806P1S1-EN-PRI-2017-064-DW_S39_final_assembly	QTOM00000000	no	yes	no	no
BURSP-Bp9125-3001P1S2-EN-PRI-2017-064-DW_S41_final_assembly	QTPT00000000	no	yes	no	no
BURSP-Bp9126-3002P1S2-EN-PRI-2017-064-DW_S42_final_assembly	QTPS00000000	no	yes	no	no
BURSP-Bp9127-3002P1S3-EN-PRI-2017-064-DW_S43_final_assembly	QTRZ00000000	no	yes	no	no
BURSP-Bp9128-3002P1S4-EN-PRI-2017-064-DW_S12_final_assembly	QTRY00000000	no	yes	no	no
BURSP-Bp9129-3002P2S1-EN-PRI-2017-064-DW_S62_final_assembly	QTRX00000000	no	yes	no	no
BURSP-Bp9130-3504P2S1-EN-PRI-2017-064-DW_S50_final_assembly	QTRW00000000	no	yes	no	no
BURSP-Bp9131-3605P2S2-EN-PRI-2017-064-DW_S56_final_assembly	QTPR00000000	no	yes	no	no
BURSP-Bp9132-3702P1S4-EN-PRI-2017-064-DW_S62_final_assembly	QTNX00000000	no	yes	no	no
BURSP-Bp9133-3703P1S5-EN-PRI-2017-064-DW_S42_final_assembly	QTOL00000000	no	yes	no	no
BURSP-Bp9134-3705P2S1-EN-PRI-2017-064-DW_S47_final_assembly	QTRV00000000	no	yes	no	no
BURSP-Bp9135-3802P1S1-EN-PRI-2017-064-DW_S22_final_assembly	QTRU00000000	no	yes	no	no
BURSP-Bp9137-3804P2S1-EN-PRI-2017-064-DW_S23_final_assembly	QTOK00000000	no	yes	no	no
BURSP-Bp9138-3805P2S1-EN-PRI-2017-064-DW_S24_final_assembly	QTOJ00000000	no	yes	no	no
BURSP-Bp9139-3901P2S1-EN-PRI-2017-064-DW_S25_final_assembly	QTRT00000000	no	yes	no	no
BURSP-Bp9140-0508P2S2B-EN-PRI-2017-064-DW_S3_final_assembly	QTPQ00000000	no	yes	no	no
BURSP-Bp9142-2707P1S1-EN-PRI-2017-064-DW_S33_final_assembly	QTPP00000000	no	yes	no	no
BURSP-Bp9143-2809P1S1-EN-PRI-2017-064-DW_S40_final_assembly	QTPO00000000	no	yes	no	no
BURSP-Bp9144-3006P1S2-EN-PRI-2017-064-DW_S13_final_assembly	QTNW00000000	no	yes	no	no
BURSP-Bp9145-3006P1S3-EN-PRI-2017-064-DW_S14_final_assembly	QTRS00000000	no	yes	no	no
BURSP-Bp9146-3006P2S1-EN-PRI-2017-064-DW_S15_final_assembly	QTRR00000000	no	yes	no	no
BURSP-Bp9147-3006P2S2-EN-PRI-2017-064-DW_S63_final_assembly	QTNV00000000	no	yes	no	no
BURSP-Bp9148-3006P2S3-EN-PRI-2017-064-DW_S44_final_assembly	QTNU00000000	no	yes	no	no
BURSP-Bp9149-3007P1S1-EN-PRI-2017-064-DW_S45_final_assembly	QTNT00000000	no	yes	no	no
BURSP-Bp9150-3009P2S2-EN-PRI-2017-064-DW_S46_final_assembly	QTRQ00000000	no	yes	no	no
BURSP-Bp9151-3010P1S1-EN-PRI-2017-064-DW_S47_final_assembly	QTOI00000000	no	yes	no	no
BURSP-Bp9152-3010P2S1-EN-PRI-2017-064-DW_S48_final_assembly	QTNS00000000	no	yes	no	no
BURSP-Bp9153-3010P2S2-EN-PRI-2017-064-DW_S49_final_assembly	QTSS00000000	no	yes	no	no
BURSP-Bp9154-3506P1S1-EN-PRI-2017-064-DW_S51_final_assembly	QTOH00000000	no	yes	no	no
BURSP-Bp9155-3706P1S1-EN-PRI-2017-064-DW_S48_final_assembly	QTOG00000000	no	yes	no	no
BURSP-Bp9156-3707P1S5-EN-PRI-2017-064-DW_S49_final_assembly	QTOF00000000	no	yes	no	no
BURSP-Bp9157-3708P1S1-EN-PRI-2017-064-DW_S19_final_assembly	QTOE00000000	no	yes	no	no
BURSP-Bp9158-3708P2S1-EN-PRI-2017-064-DW_S20_final_assembly	QTRP00000000	no	yes	no	no
